# Supplementary material for: Effect of the flexible chain length of a dimetal subunit on the formation of 1D coordination polymers to molecular rectangles
Source: Royal Society of Chemistry journal article supplement (doi:10.1039/d2dt02850f), 2022-01-01
Supplement: d2dt02850f1.pdf [file d2dt02850f1.pdf]

## Electronic Supplementary Information

### Effect of flexible chain length of the dimetal subunit on the formation of 1D coordination polymer to molecular rectangle

Alisha Gogia<sup>a</sup>, Sadhika Khullar<sup>\*b</sup>, Alokanda Chanda<sup>a</sup> and Sanjay K. Mandal<sup>\*a</sup>

<sup>a</sup>Department of Chemical Sciences, Indian Institute of Science Education and Research Mohali, Sector 81, Manauli PO, S.A.S. Nagar, Mohali, Punjab 140306, India

<sup>b</sup>Department of Chemistry, Dr BR Ambedkar National Institute of Technology Jalandhar, Jalandhar, Punjab 144011, India

\*Authors for correspondence:

Dr. Sadhika Khullar, Email: [khullars@nitj.ac.in](mailto:khullars@nitj.ac.in)

Prof. Sanjay K. Mandal, E-mail: [sanjaymandal@iisermohali.ac.in](mailto:sanjaymandal@iisermohali.ac.in)

## Table of Contents

| <b>Item</b>         |                                                                                                                                 | <b>Page No.</b> |
|---------------------|---------------------------------------------------------------------------------------------------------------------------------|-----------------|
| <b>Fig. S1</b>      | Solid-state diffuse reflectance spectra of <b>1-4</b>                                                                           | S3              |
| <b>Fig. S2-S5</b>   | FTIR spectra of <b>1-4</b>                                                                                                      | S4-S7           |
| <b>Fig. S6-S7</b>   | ESI mass spectra of <b>1</b> and <b>4</b>                                                                                       | S8              |
| <b>Fig. S8</b>      | UV-vis spectra of <b>1-4</b> in a 1:1 H <sub>2</sub> O and CH <sub>3</sub> CN solution                                          | S9              |
| <b>Fig. S9</b>      | ORTEP view of <b>1</b>                                                                                                          | S9              |
| <b>Fig. S10</b>     | ORTEP view of <b>2</b>                                                                                                          | S10             |
| <b>Fig. S11</b>     | Coordination environment around Cu(II) centers in <b>2</b>                                                                      | S10             |
| <b>Fig. S12</b>     | Perspective view of 1D CP of <b>2</b>                                                                                           | S11             |
| <b>Fig. S13</b>     | ORTEP view of <b>3</b>                                                                                                          | S11             |
| <b>Fig. S14</b>     | ORTEP view of <b>4</b>                                                                                                          | S12             |
| <b>Fig. S15</b>     | Perspective view of packing of molecular rectangles in <b>4</b>                                                                 | S13             |
| <b>Fig. S16-S38</b> | Catalysis study of <b>1-4</b>                                                                                                   | S14-S36         |
| <b>Fig. S39-S40</b> | Stability of <b>2</b> and <b>4</b> after catalysis                                                                              | S37             |
| <b>Table S1</b>     | Selected bond lengths (Å) and bond angles (°) of <b>1</b>                                                                       | S38             |
| <b>Table S2</b>     | Hydrogen bonding parameters for <b>1</b>                                                                                        | S38             |
| <b>Table S3</b>     | Selected bond lengths (Å) and bond angles (°) of <b>2</b>                                                                       | S39             |
| <b>Table S4</b>     | Hydrogen bonding parameters for <b>2</b>                                                                                        | S40             |
| <b>Table S5</b>     | Selected bond lengths (Å) and bond angles (°) of <b>3</b>                                                                       | S41             |
| <b>Table S6</b>     | Selected bond lengths (Å) and bond angles (°) of <b>4</b>                                                                       | S41             |
| <b>Table S7</b>     | Comparison of the catalytic activity of various MOCNs in the Knoevenagel condensation reaction of an aldehyde and malononitrile | S42             |

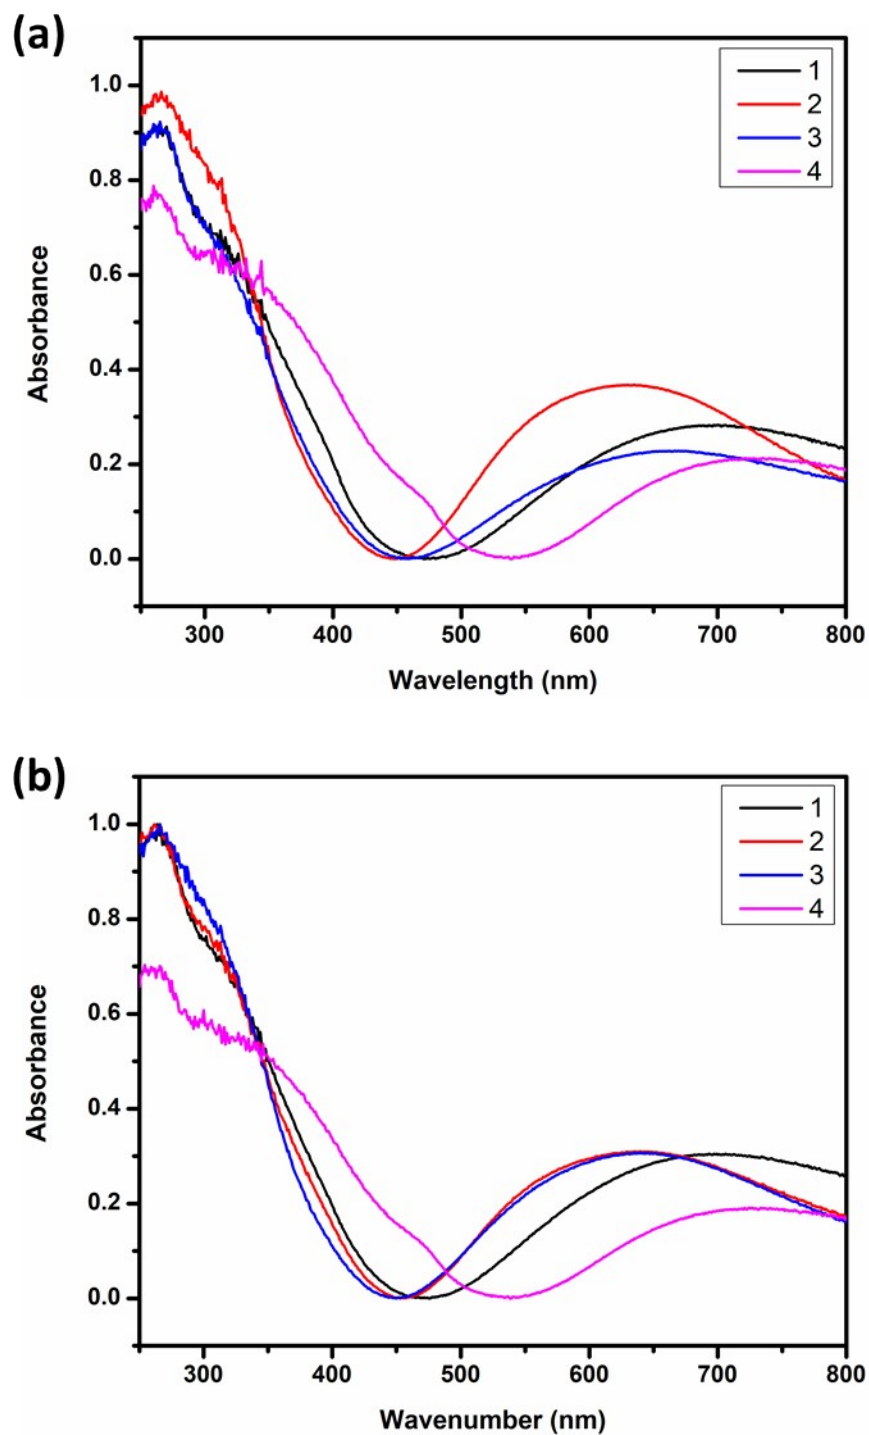

**Fig S1.** Solid-state diffuse reflectance spectra of (a) as-synthesized **1-4**, and (b) solid crystals of **1-4** isolated from their respective solution in 1:1 H<sub>2</sub>O/CH<sub>3</sub>CN.  $\lambda_{\text{max}}$  (nm) for the d-d transition: 693 for **1**; 623 for **2**; 654 for **3** and 732 for **4**.

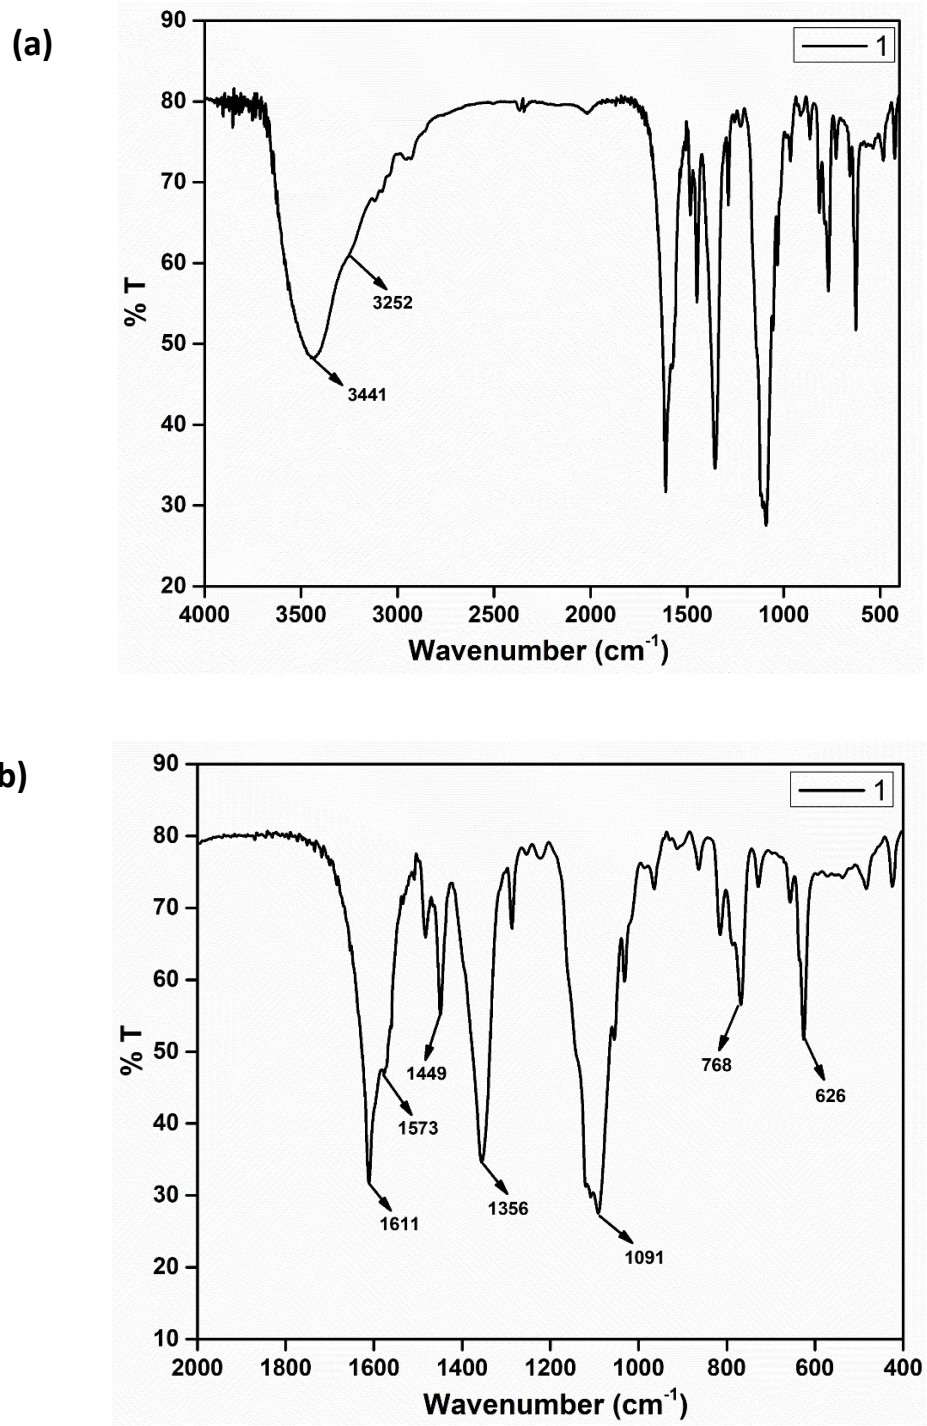

Fig. S2 (a) Full and (b) expanded region in FTIR spectrum of 1.

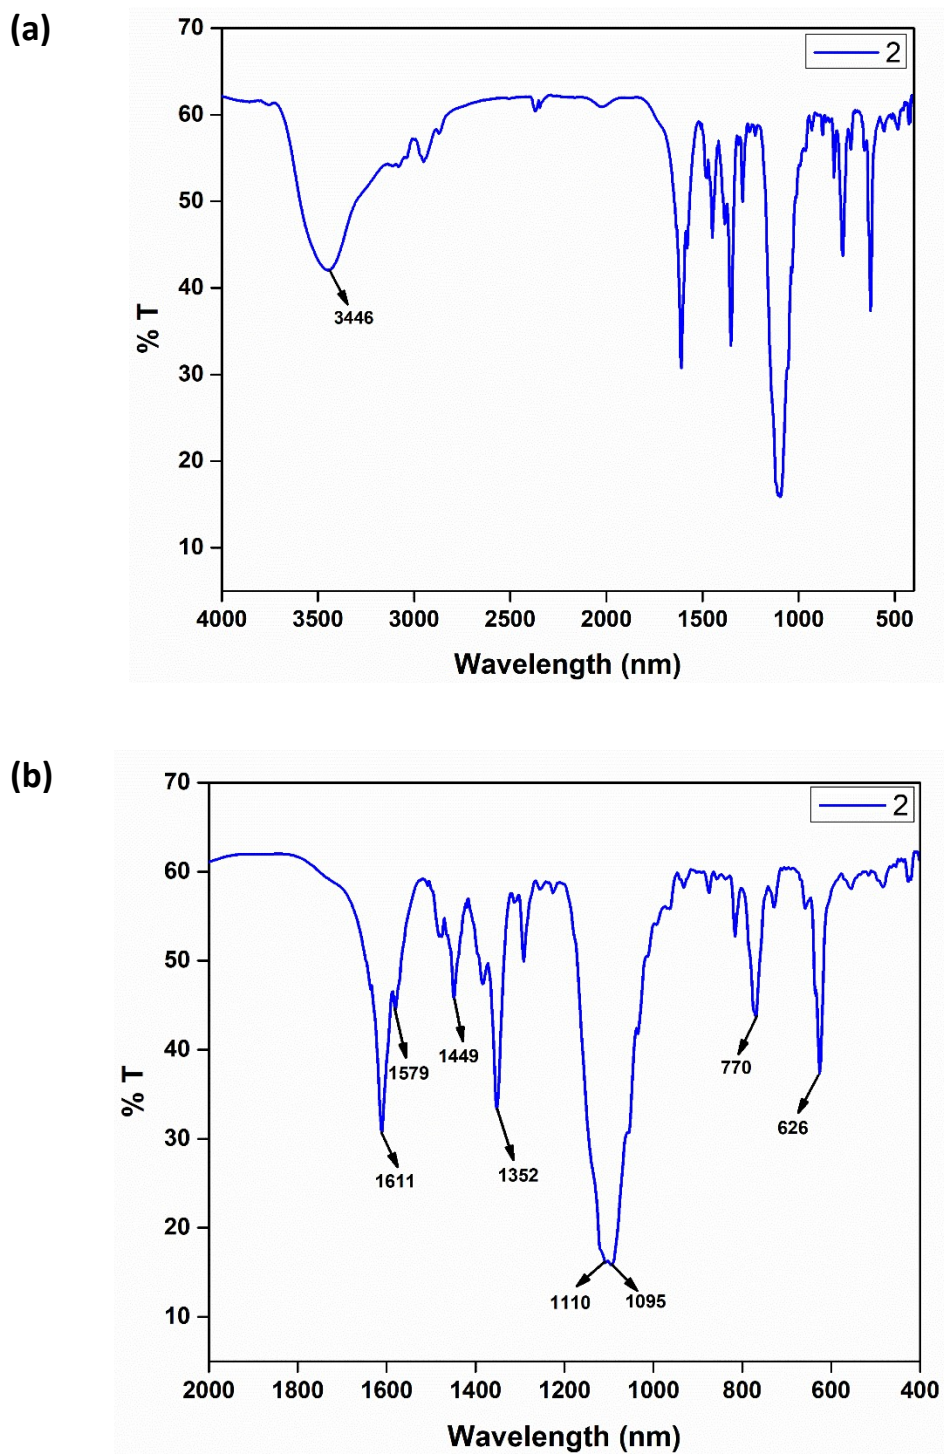

**Fig. S3** (a) Full and (b) expanded region in FTIR spectrum of **2**.

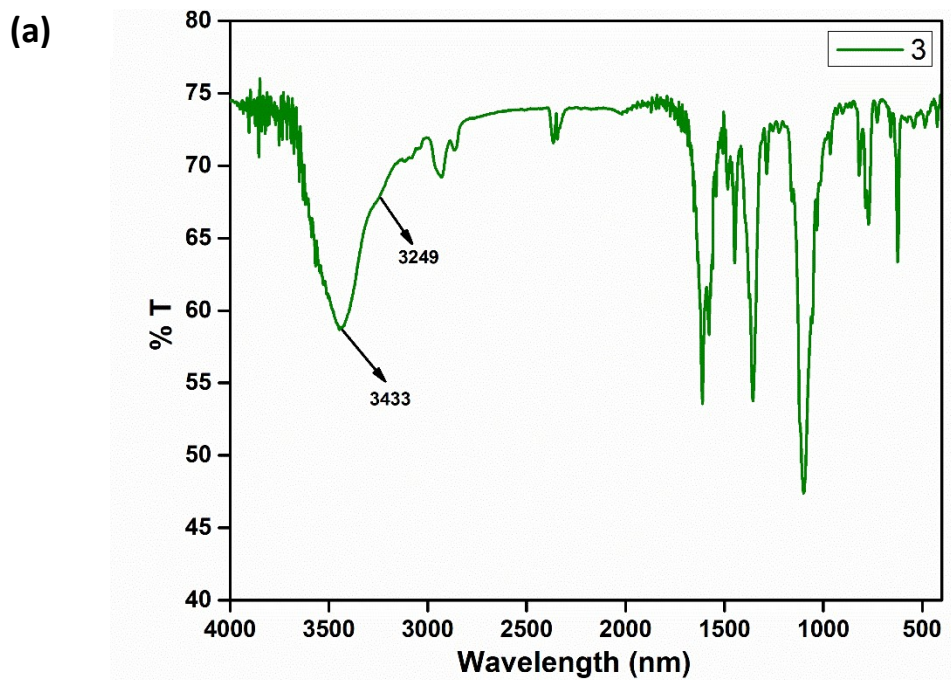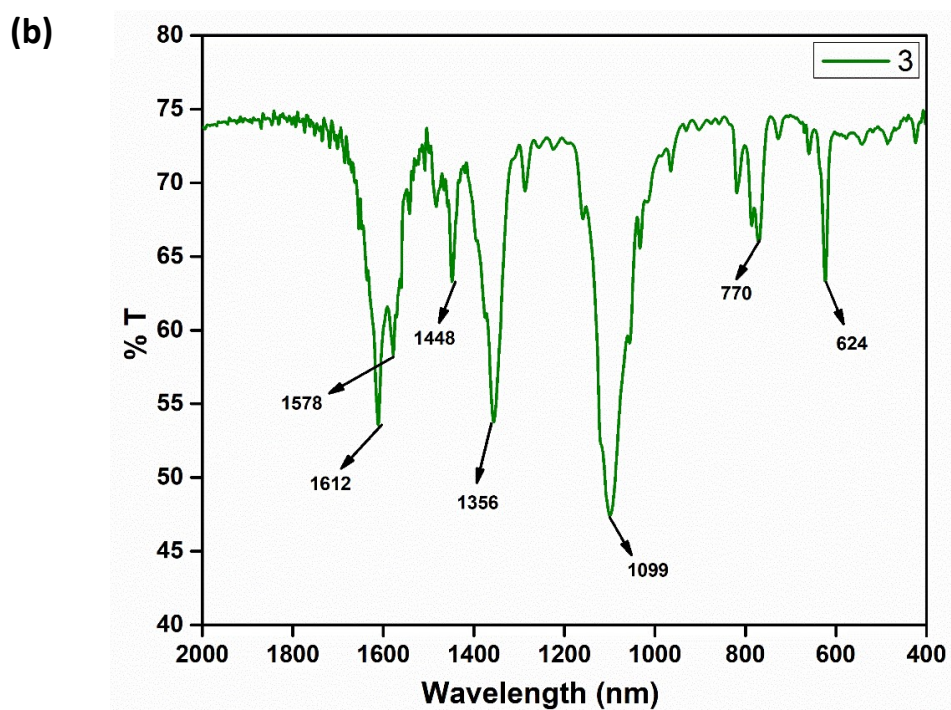

**Fig. S4** (a) Full and (b) expanded region in FTIR spectrum of **3**.

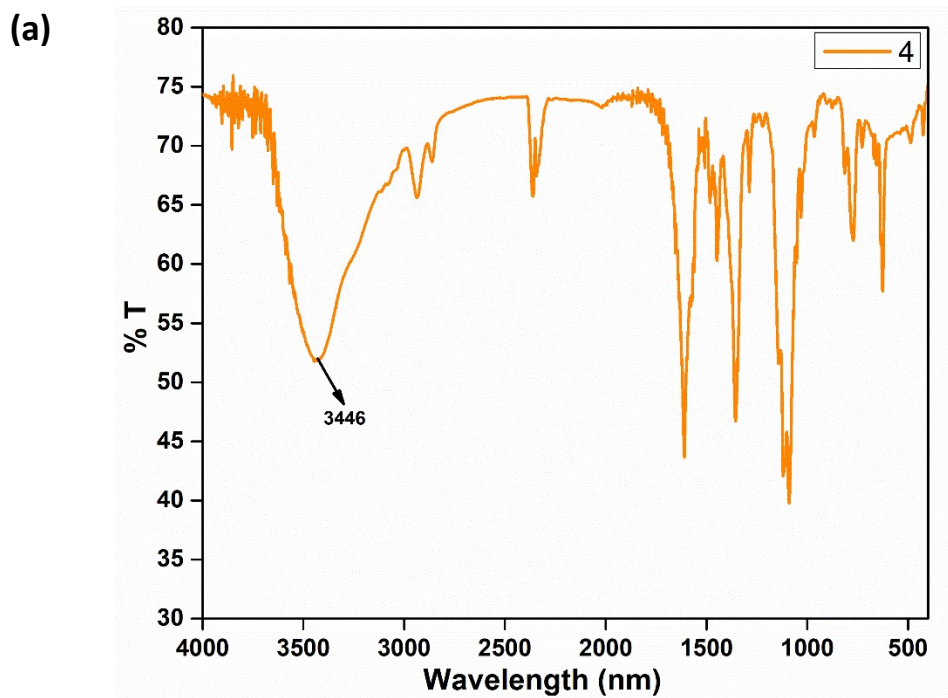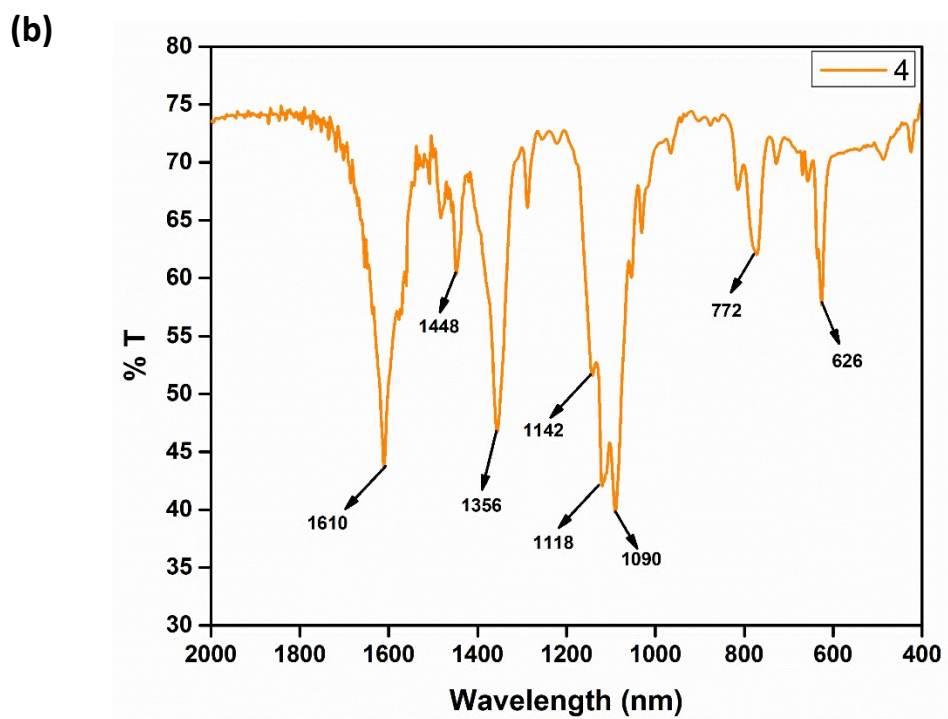

Fig. S5 (a) Full and (b) expanded region in FTIR spectrum of 4.

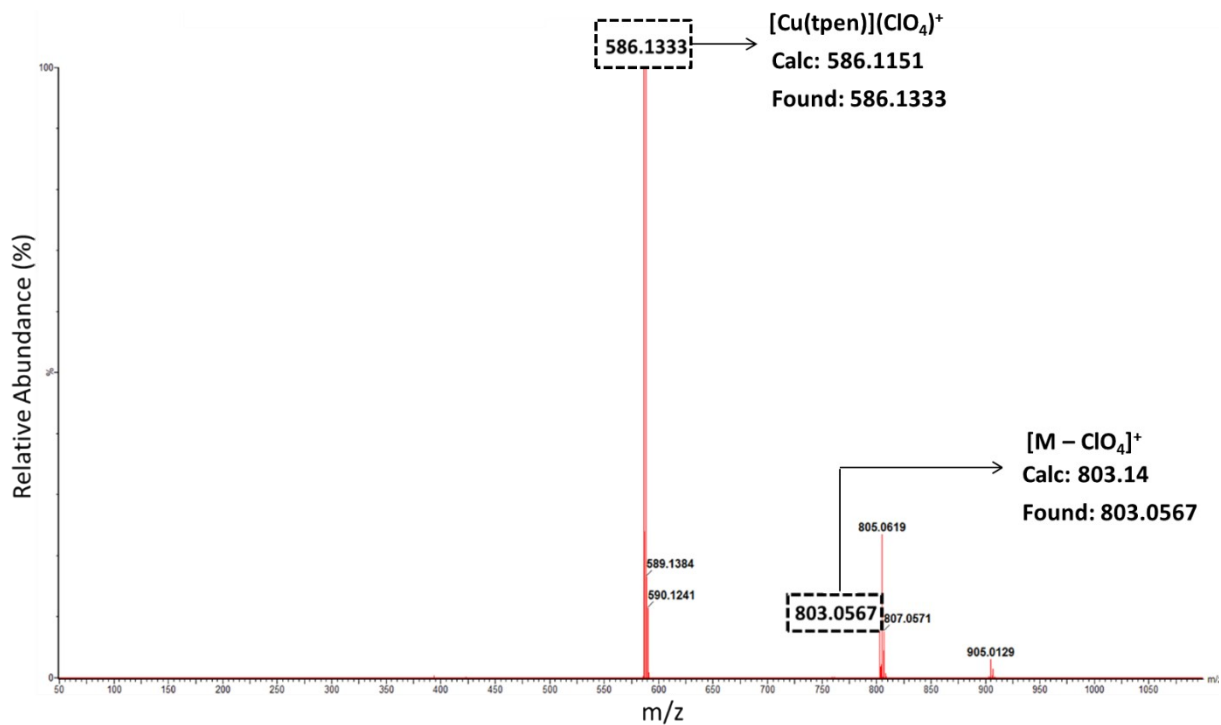

**Fig. S6** ESI mass spectrum of **1** in  $\text{H}_2\text{O}$ .

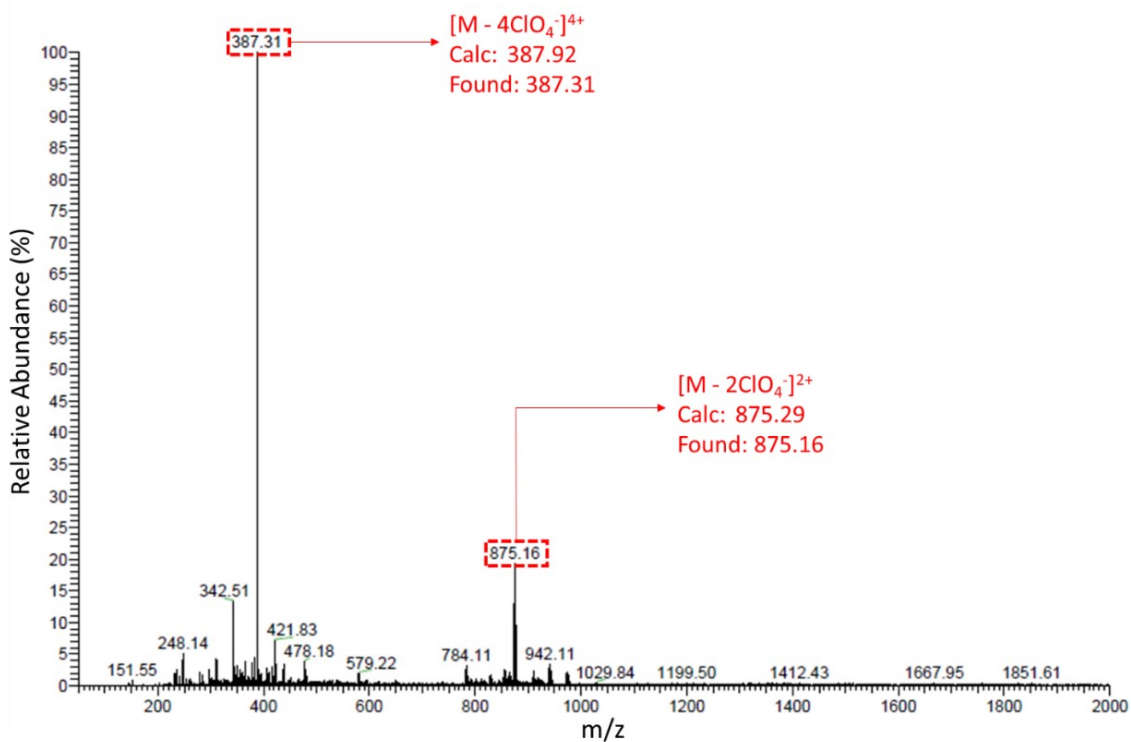

**Fig. S7** ESI mass spectrum of **4** in  $\text{H}_2\text{O}/\text{CH}_3\text{CN}$ .



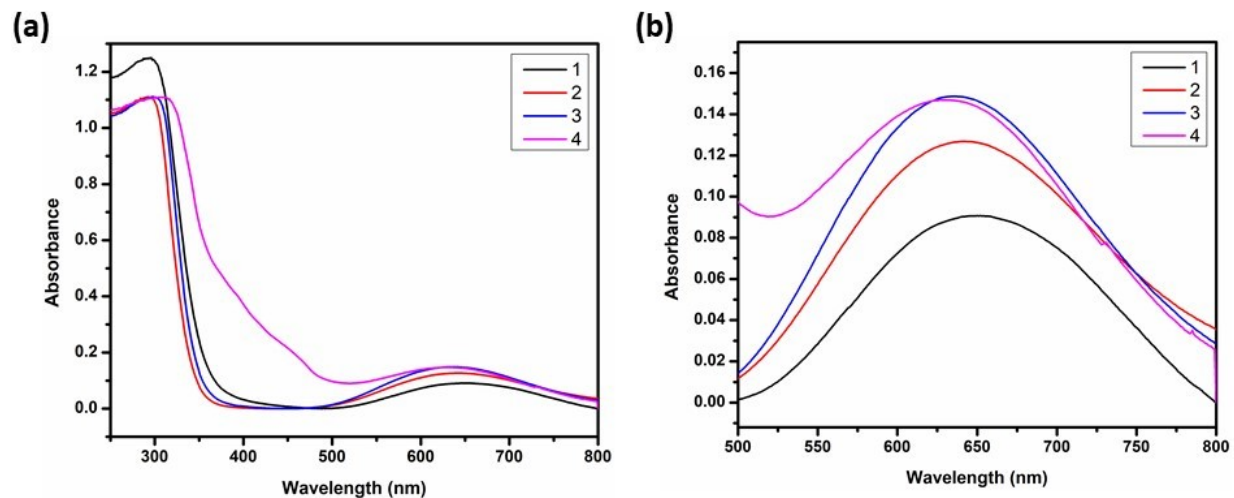

**Fig. 8** UV-vis spectra of **1-4** in a 1:1 H<sub>2</sub>O and CH<sub>3</sub>CN solution: (a) full and (b) expanded visible region.

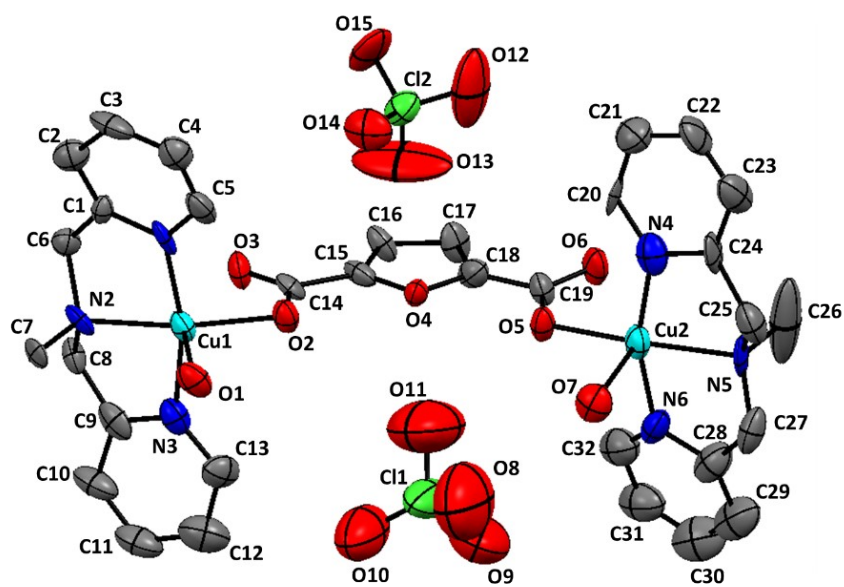

**Fig. S9** ORTEP view of **1** describing coordination environment around the Cu(II) centers.

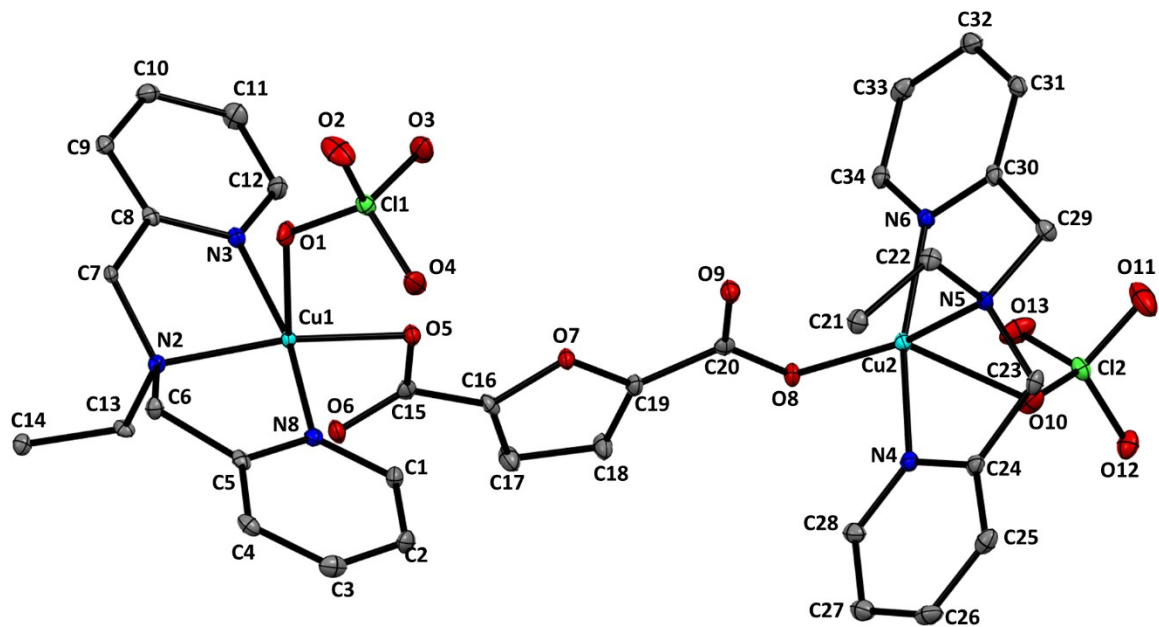

Fig. S10 ORTEP view of 2.

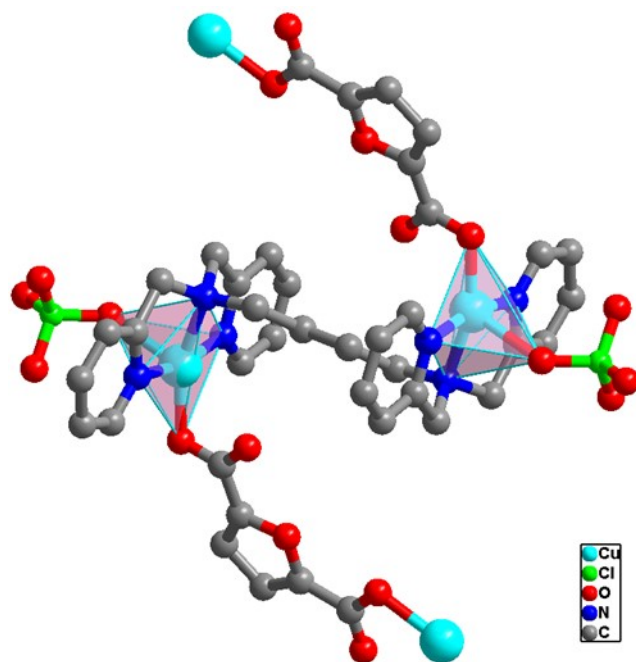

Fig. S11 Coordination environment around Cu(II) centers in 2.

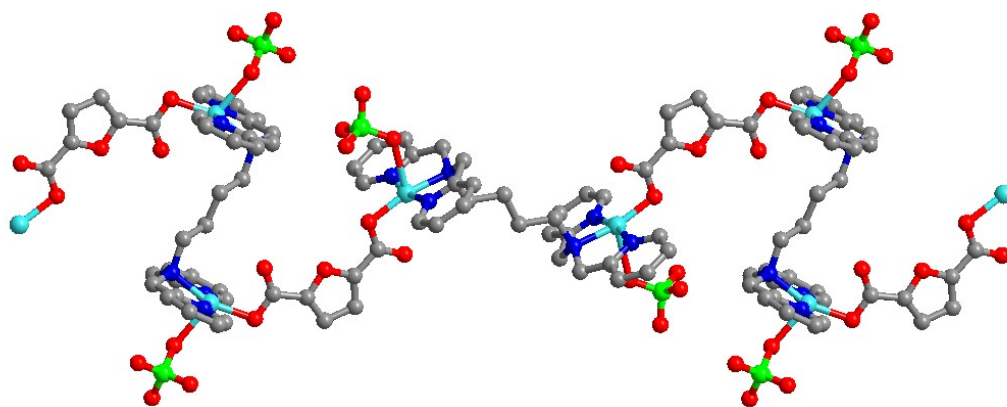

**Fig. S12** Perspective view of a 1D coordination polymer of **2**.

---

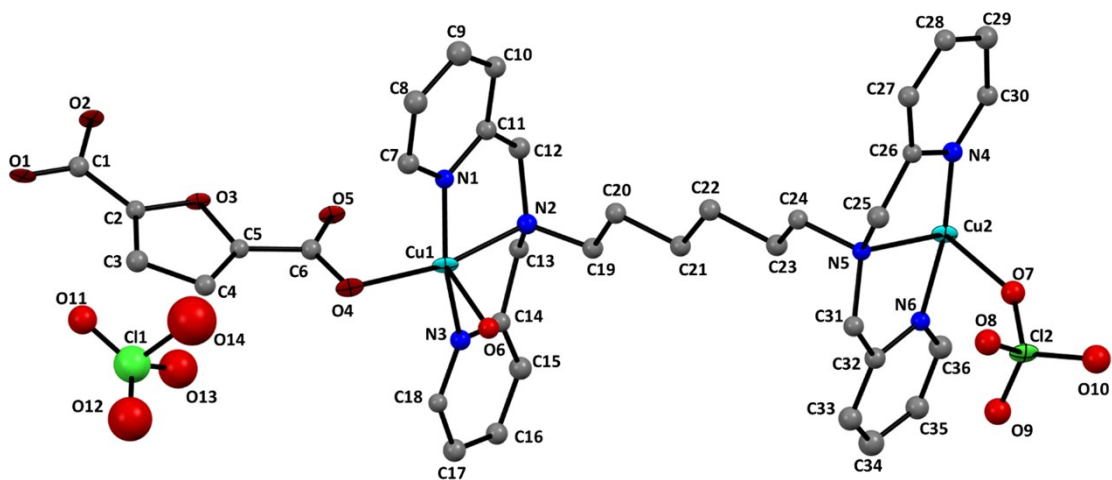

**Fig. S13** ORTEP view of **3** describing the coordination environment around the Cu(II) centers.

---

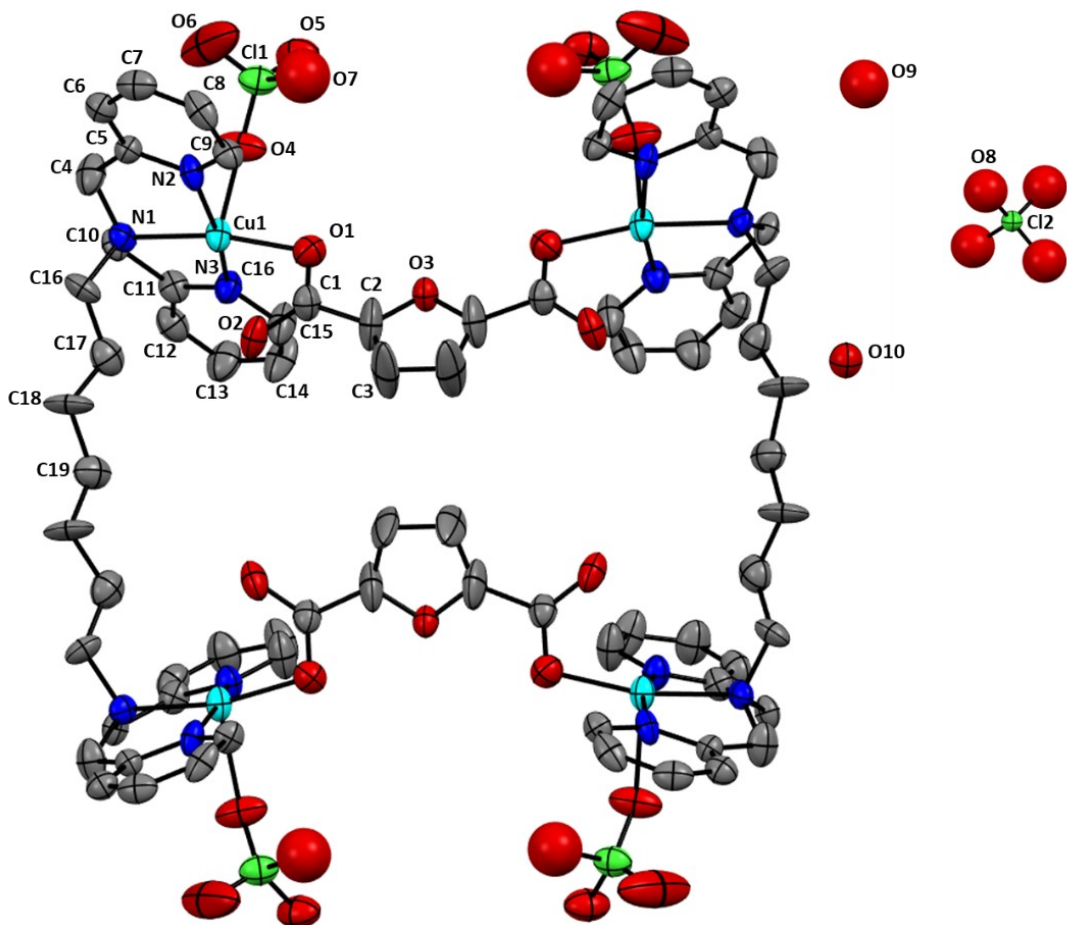

**Fig. S14** ORTEP view of **4** where one-fourth of the molecule is in the asymmetric unit.

---

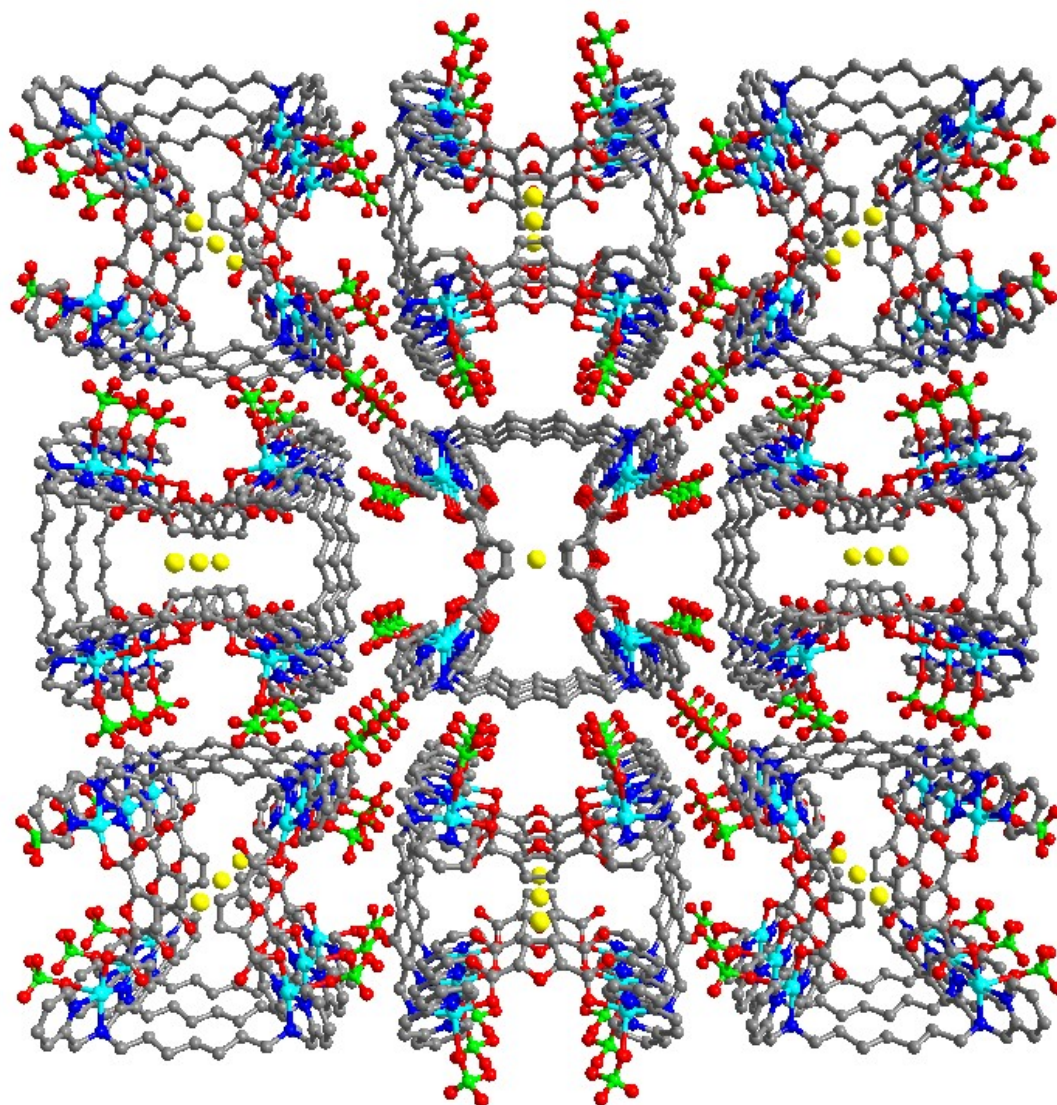

**Fig. S15** Packing diagram of molecular rectangles in **4**. (Color codes: carbon, grey; oxygen, red; nitrogen, blue; copper, cyan; sodium, yellow).

---

## Catalysis study of 1-4

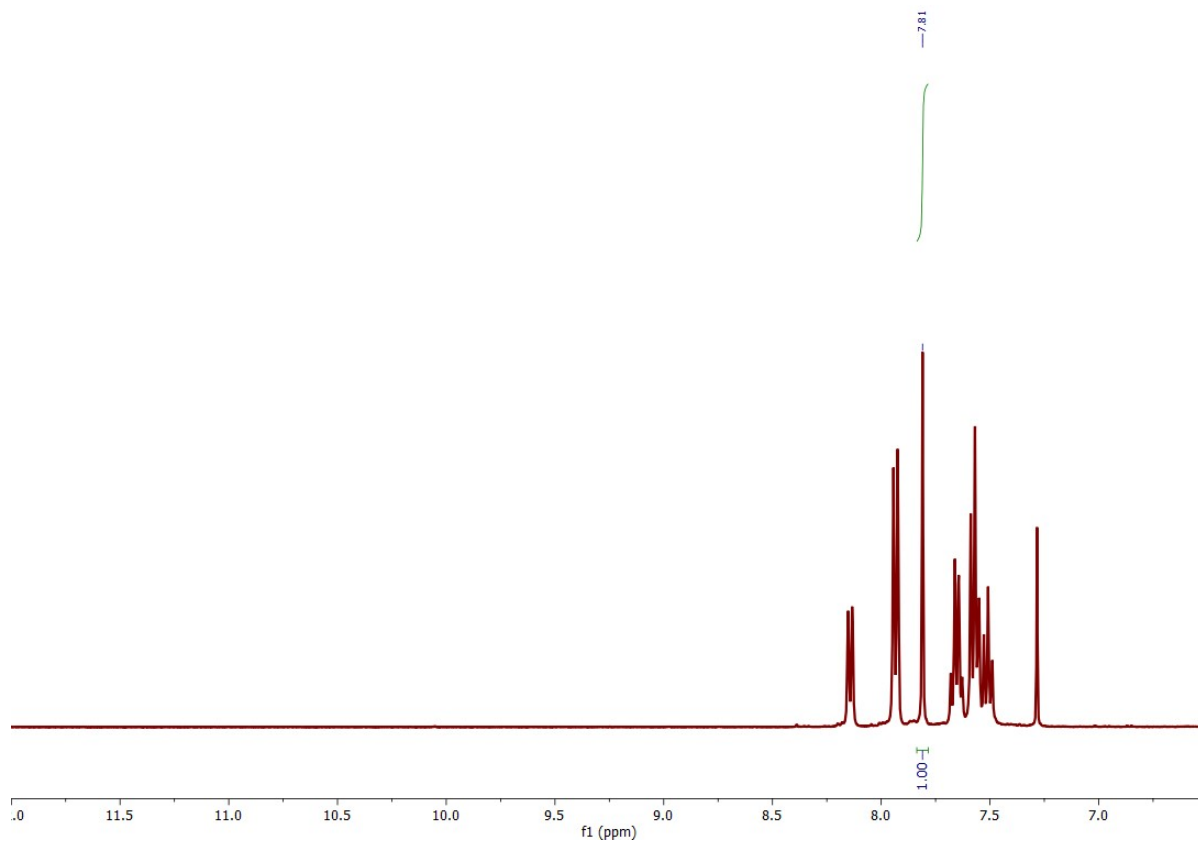

**Fig. S16** Example of integration in the <sup>1</sup>H NMR spectrum for the determination of catalysis reaction product (Table 3, Entry 1).

### **Calculation of the Conversion (%) in the Knoevenagel condensation reaction of benzaldehyde with malononitrile catalyzed by 1a**

Total amount of compounds at the end: Unreacted bezaldehyde (10.01 ppm) + 2-(benzylidene)malononitrile (7.81 ppm) = 0 + 1.00 = 1

Conversion (%) of 2-(benzylidene)malononitrile =  $(1/1) * 100 = 100\%$ .

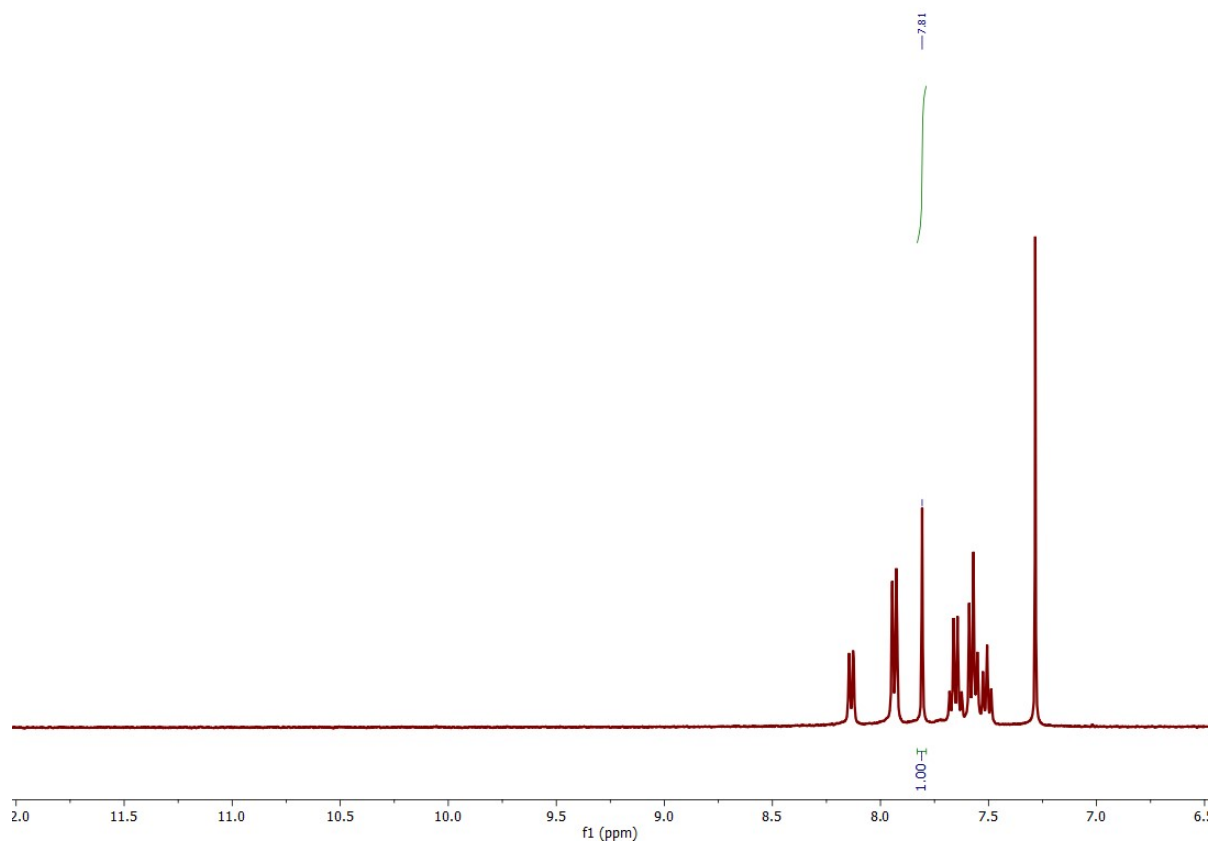

**Fig. S17** Example of integration in the  $^1\text{H}$  NMR spectrum for the determination of catalysis reaction product (Table 3, Entry 3).

**Calculation of the Conversion (%) in the Knoevenagel condensation reaction of benzaldehyde with malononitrile catalyzed by 2a**

Total amount of compounds at the end: Unreacted bezaldehyde (10.01 ppm) + 2-(benzylidene)malononitrile (7.81 ppm) = 0 + 1.00 = 1

Conversion (%) of 2-(benzylidene)malononitrile =  $(1/1) * 100 = 100\%$ .

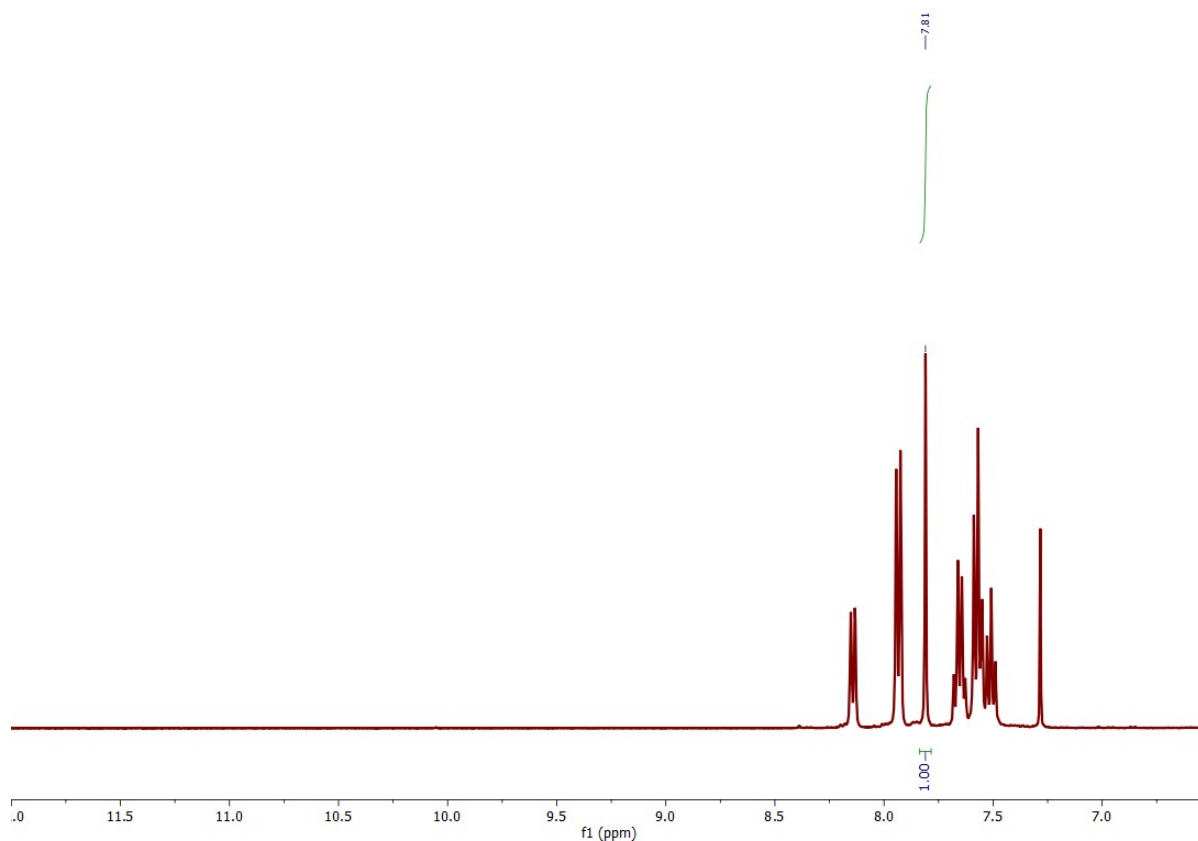

**Fig. S18** Example of integration in the  $^1\text{H}$  NMR spectrum for the determination of catalysis reaction product (Table 3, Entry 6).

**Calculation of the Conversion (%) in the Knoevenagel condensation reaction of benzaldehyde with malononitrile catalyzed by 3a**

Total amount of compounds at the end: Unreacted bezaldehyde (10.01 ppm) + 2-(benzylidene)malononitrile (7.81 ppm) = 0 + 1.00 = 1

Conversion (%) of 2-(benzylidene)malononitrile =  $(1/1) * 100 = 100\%$ .



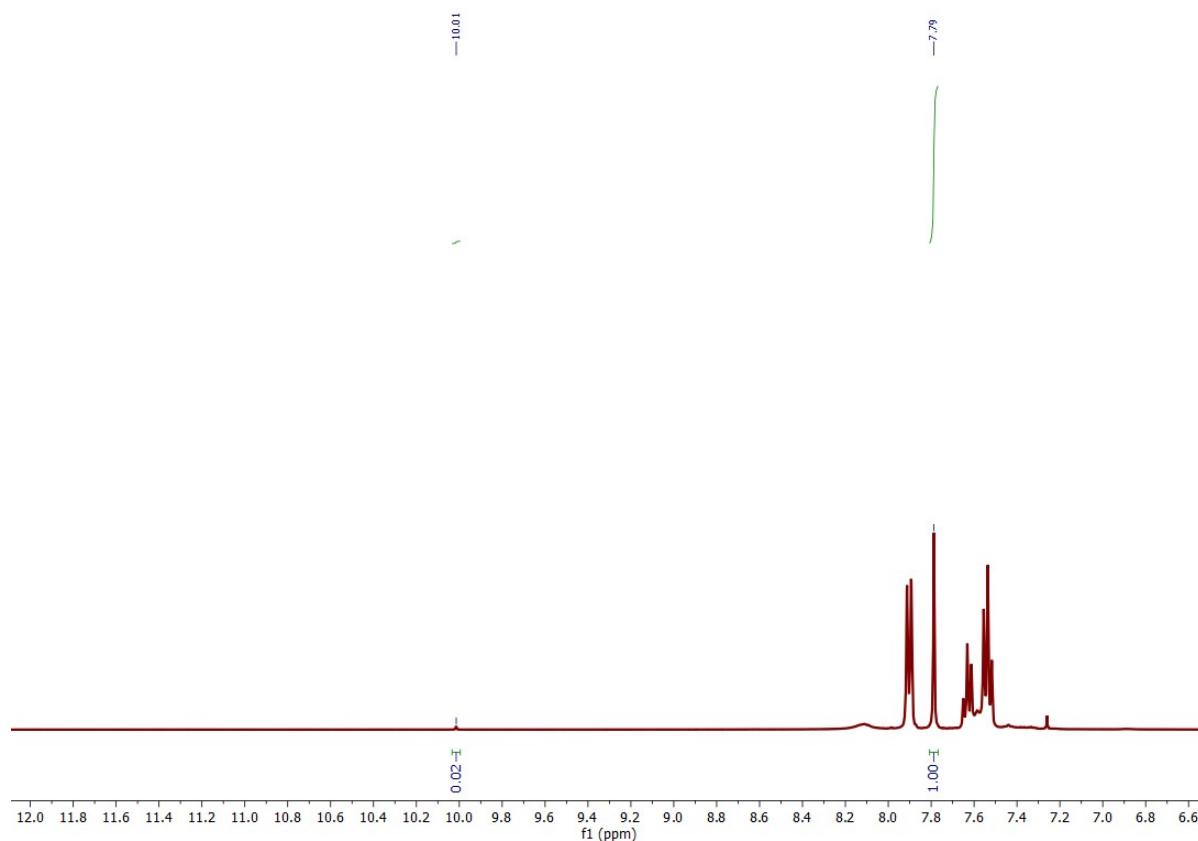

**Fig. S19** Example of integration in the <sup>1</sup>H NMR spectrum for the determination of catalysis reaction product (Table 3, Entry 8).

**Calculation of the Conversion (%) in the Knoevenagel condensation reaction of benzaldehyde with malononitrile catalyzed by 4a**

Total amount of compounds at the end: Unreacted benzaldehyde (10.01 ppm) + 2-(benzylidene)malononitrile (7.81 ppm) = 0.02 + 1.00 = 1.02

Conversion (%) of 2-(benzylidene)malononitrile =  $(1/1.02) * 100 = 98\%$ .

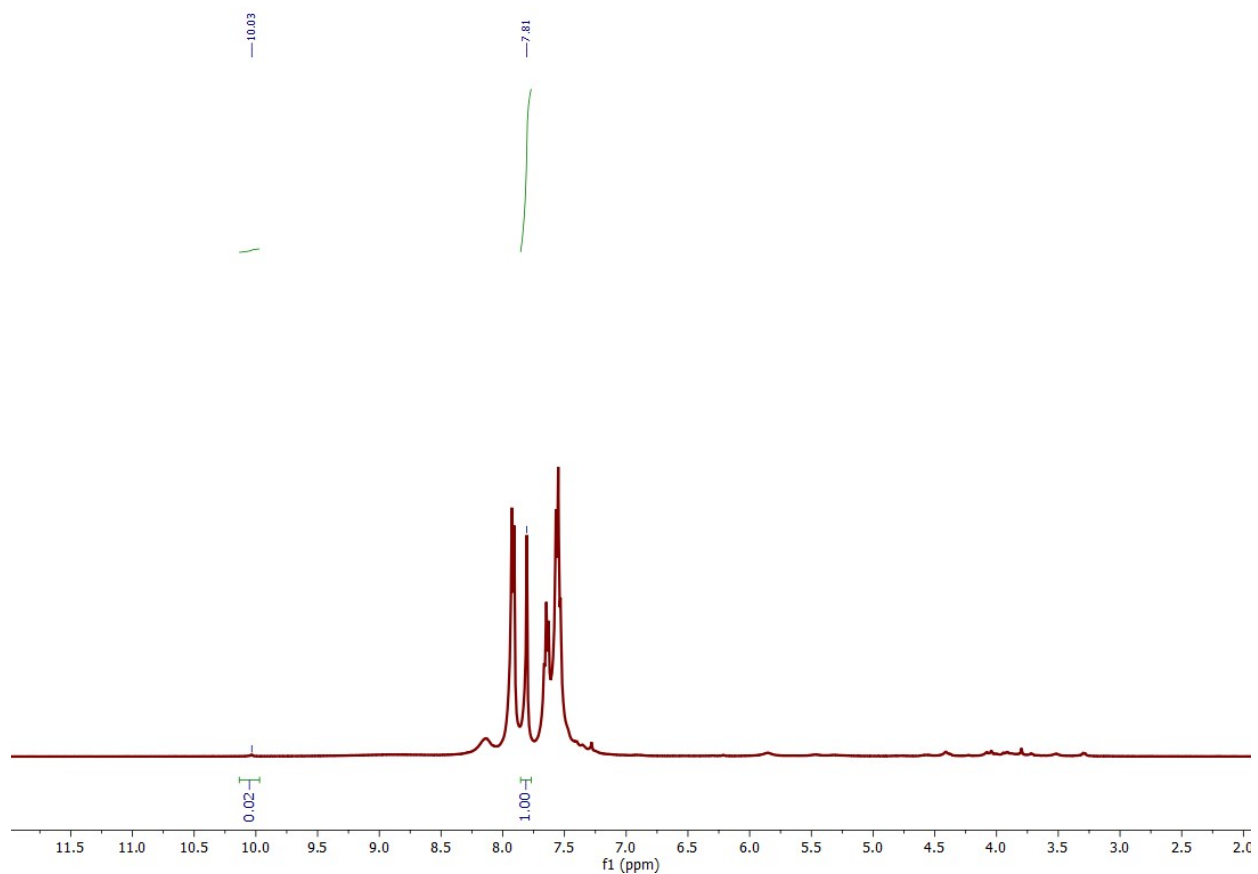

**Fig. S20** Example of integration in the <sup>1</sup>H NMR spectrum for the determination of catalysis reaction product (Table 3, Entry 10).

**Calculation of the Conversion (%) in the Knoevenagel condensation reaction of benzaldehyde with malononitrile catalyzed by un-activated 2**

Total amount of compounds at the end: Unreacted bezaldehyde (10.03 ppm) + 2-(benzylidene)malononitrile (7.81 ppm) = 0.02 + 1.00 = 1.02

Conversion (%) of 2-(benzylidene)malononitrile =  $(1/1.02) * 100 = 98\%$ .

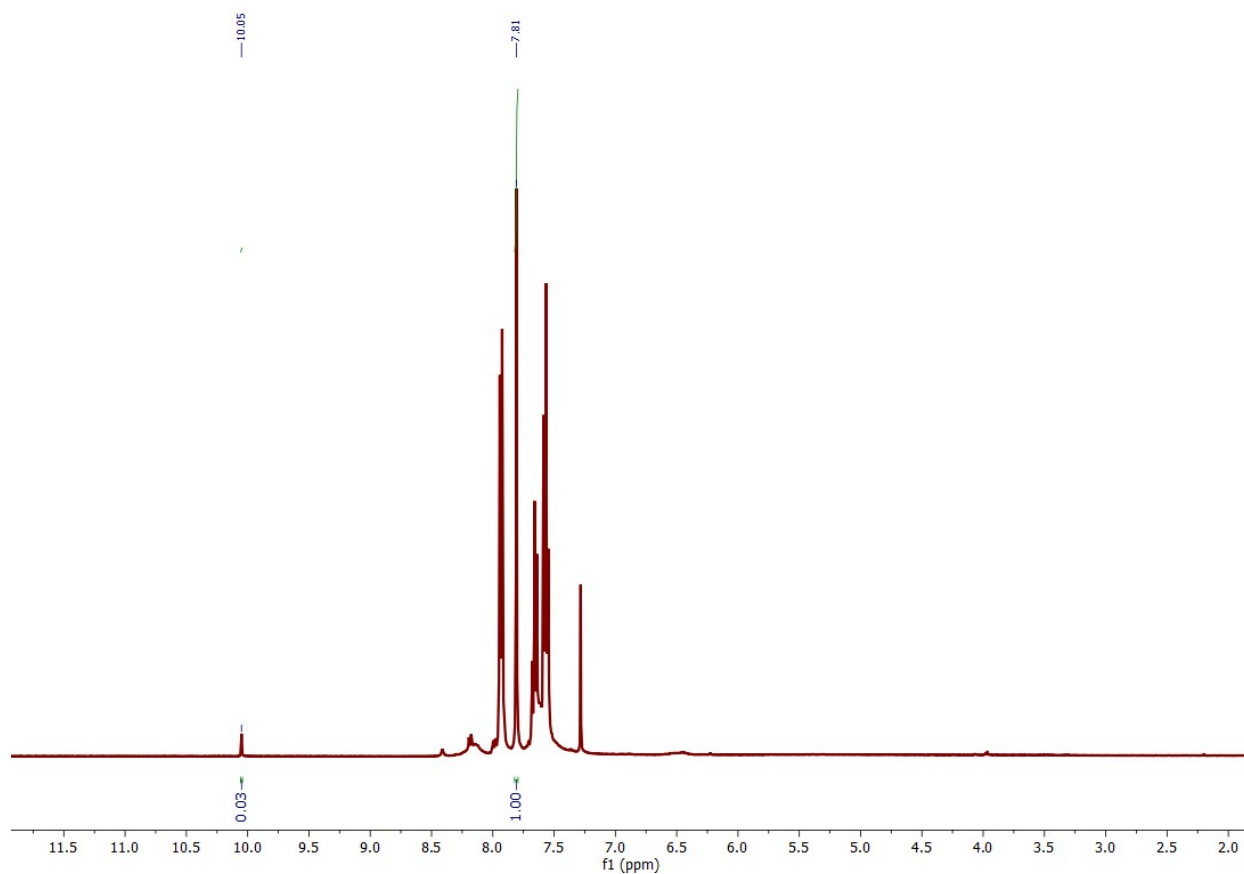

**Fig. S21** Example of integration in the <sup>1</sup>H NMR spectrum for the determination of catalysis reaction product (Table 3, Entry 11).

**Calculation of the Conversion (%) in the Knoevenagel condensation reaction of benzaldehyde with malononitrile catalyzed by un-activated 4**

Total amount of compounds at the end: Unreacted bezaldehyde (10.05 ppm) + 2-(benzylidene)malononitrile (7.81 ppm) = 0.03 + 1.00 = 1.03

Conversion (%) of 2-(benzylidene)malononitrile =  $(1/1.03) * 100 = 97\%$ .

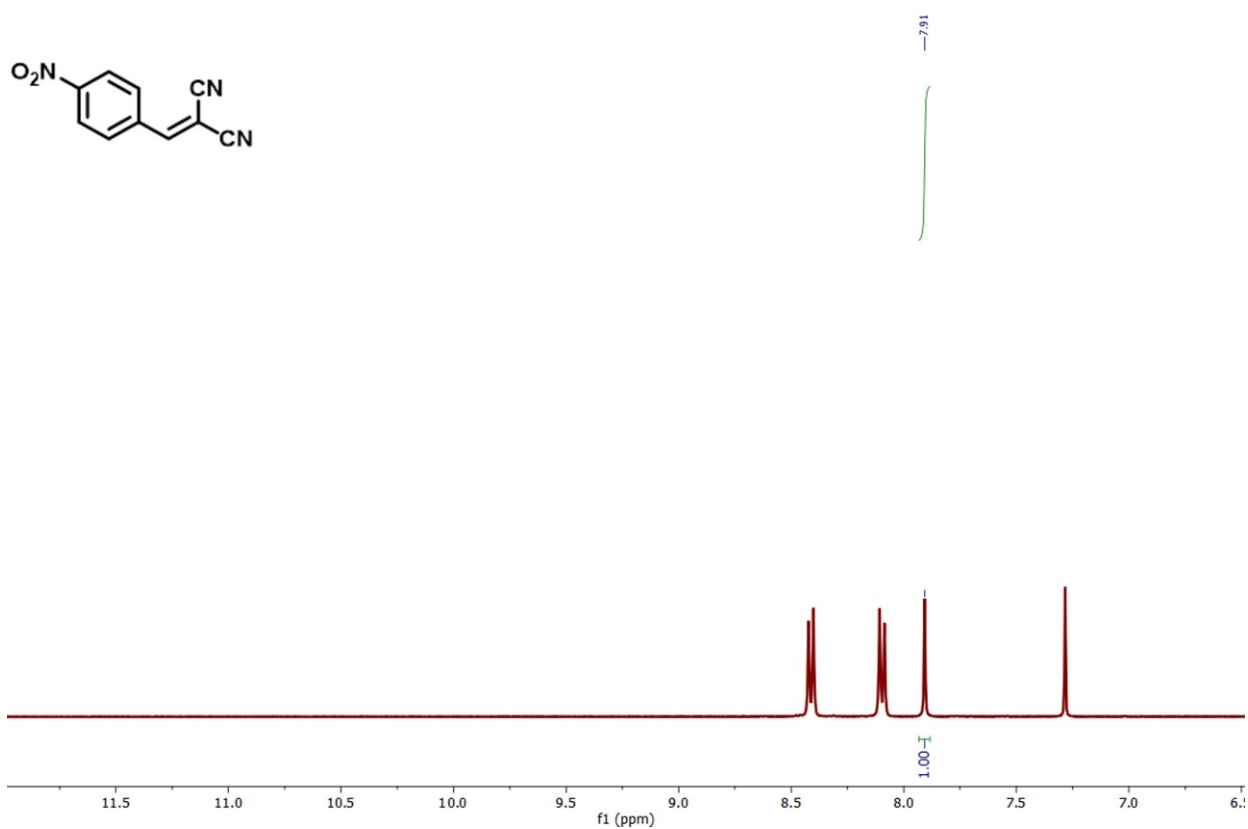

**Fig. S22** <sup>1</sup>H NMR spectrum of 2-(4-nitrobenzylidene)malononitrile in CDCl<sub>3</sub>.

**Calculation of the conversion (%) in the Knoevenagel condensation reaction of 4-nitrobenzaldehyde with malononitrile catalyzed by 2a (Table 4, entry 1)**

Total amount of compounds at the end: Unreacted 4-nitrobenzaldehyde (10.01 ppm) + 2-(4-nitrobenzylidene)malononitrile (7.91 ppm) = 0 + 1.00 = 1

Conversion (%) of 2-(4-nitrobenzylidene)malononitrile = (1/1) \* 100 = 100%.

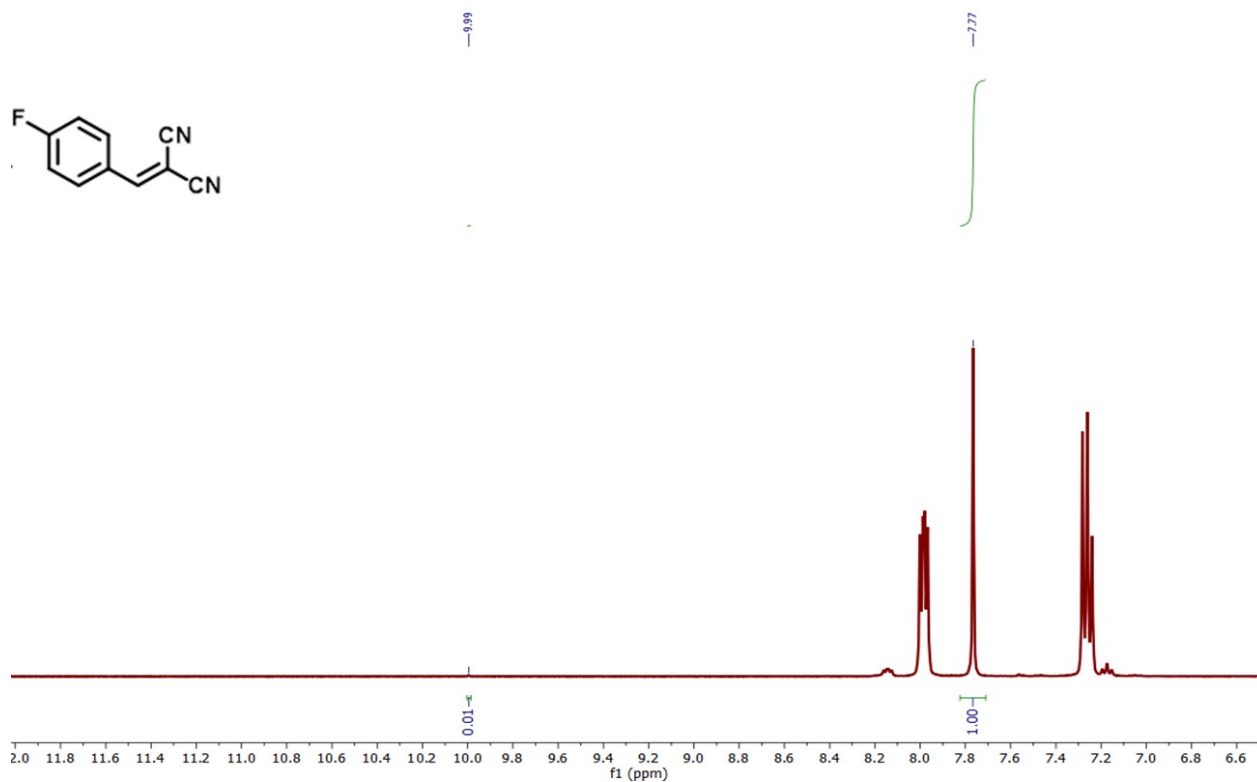

**Fig. S23** <sup>1</sup>H NMR spectrum of 2-(4-fluorobenzylidene)malononitrile in CDCl<sub>3</sub>.

**Calculation of the conversion (%) in the Knoevenagel condensation reaction of 4-fluorobenzaldehyde with malononitrile catalyzed by 2a** (Table 4, entry 2)

Total amount of compounds at the end: Unreacted 4-fluorobenzaldehyde (9.99 ppm) + 2-(4-fluorobenzylidene)malononitrile (7.77 ppm) = 0.01 + 1.00 = 1.01

Conversion (%) of 2-(4-fluorobenzylidene)malononitrile =  $(1/1.01) * 100 = 99\%$ .

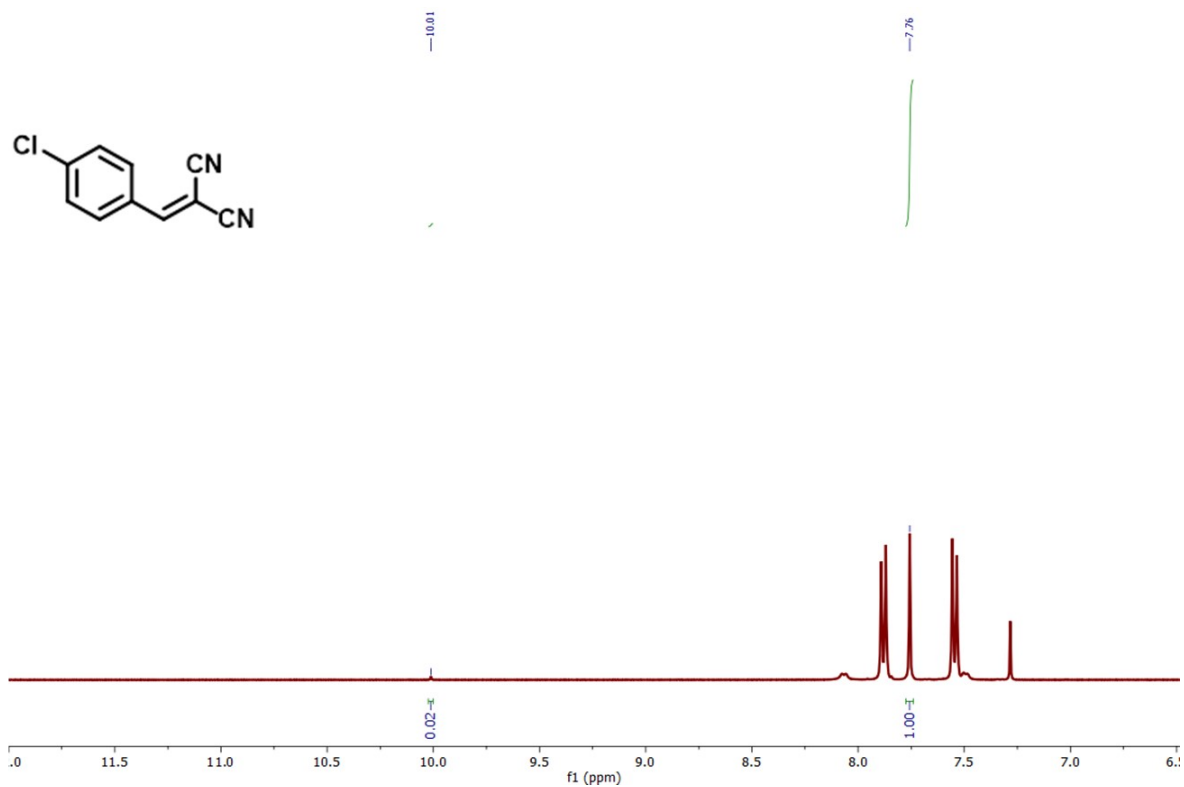

**Fig. S24** <sup>1</sup>H NMR spectrum of 2-(4-chlorobenzylidene)malononitrile in CDCl<sub>3</sub>.

**Calculation of the conversion (%) in the Knoevenagel condensation reaction of 4-chlorobenzaldehyde with malononitrile catalyzed by 2a (Table 4, entry 3)**

Total amount of compounds at the end: Unreacted 4-chlorobenzaldehyde (10.01 ppm) + 2-(4-chlorobenzylidene)malononitrile (7.76 ppm) = 0.02 + 1.00 = 1.02

Conversion (%) of 2-(4-chlorobenzylidene)malononitrile = (1/1.01) \* 100 = 98%.

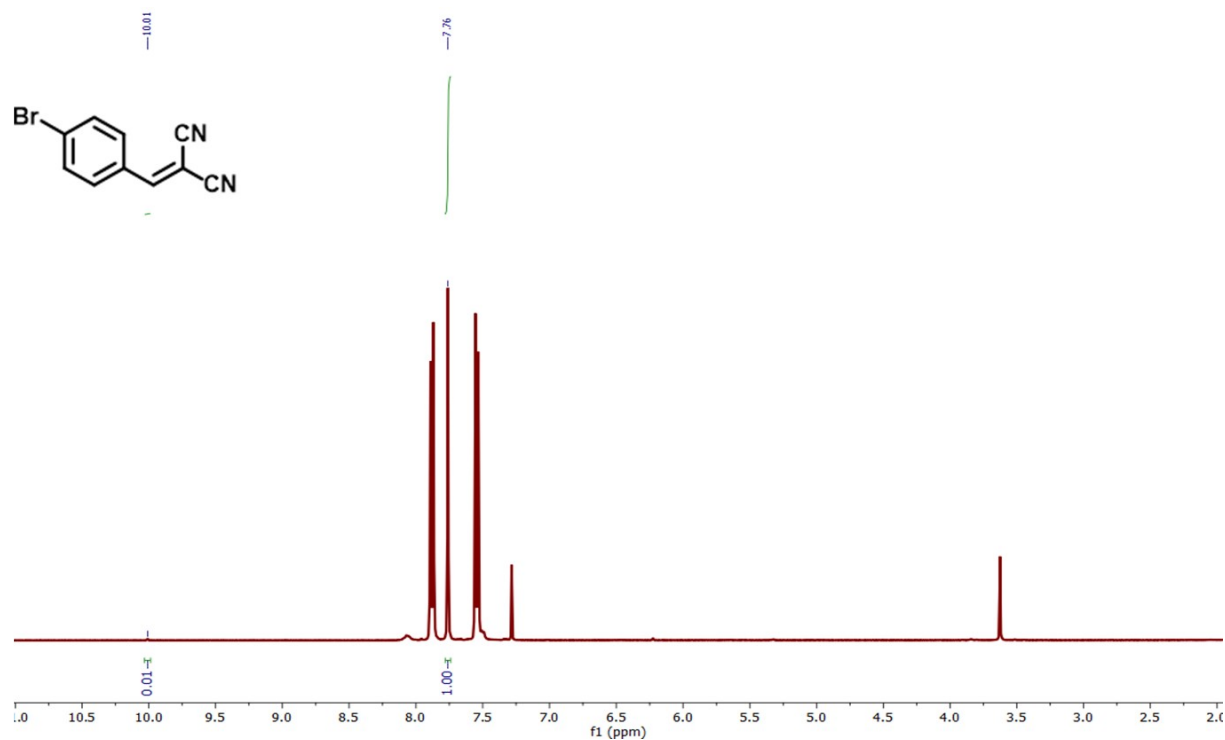

**Fig. S25** <sup>1</sup>H NMR spectrum of 2-(4-bromobenzylidene)malononitrile in CDCl<sub>3</sub>.

**Calculation of the conversion (%) in the Knoevenagel condensation reaction of 4-bromobenzaldehyde with malononitrile catalyzed by 2a (Table 4, entry 4)**

Total amount of compounds at the end: Unreacted 4-bromobenzaldehyde (10.01 ppm) + 2-(4-bromobenzylidene)malononitrile (7.76 ppm) = 0.01 + 1.00 = 1.01

Conversion (%) of 2-(4-bromobenzylidene)malononitrile =  $(1/1.01) * 100 = 99\%$ .

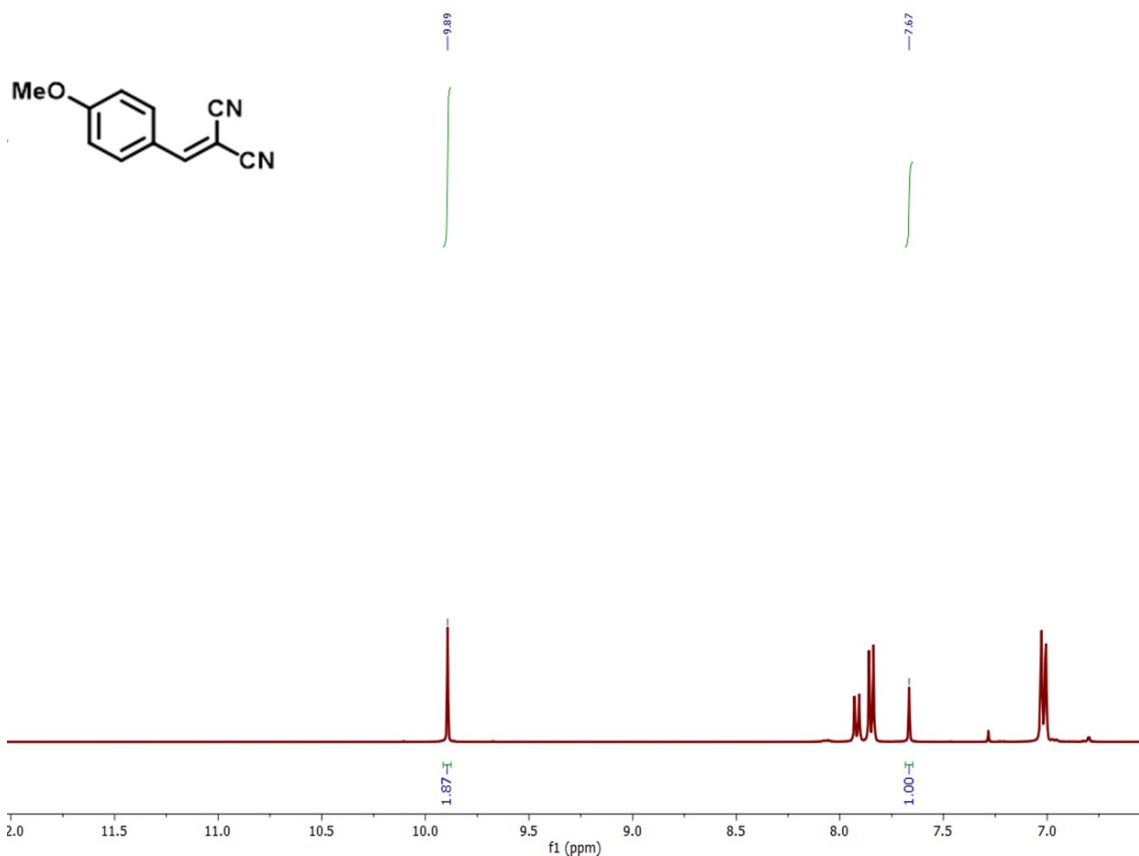

**Fig. S26** <sup>1</sup>H NMR spectrum of 2-(4-methoxybenzylidene)malononitrile in CDCl<sub>3</sub>.

**Calculation of the conversion (%) in the Knoevenagel condensation reaction of 4-methoxybenzaldehyde with malononitrile catalyzed by 2a (Table 4, entry 5)**

Total amount of compounds at the end: Unreacted 4-methoxybenzaldehyde (9.89 ppm) + 2-(4-methoxybenzylidene)malononitrile (7.67 ppm) = 1.87 + 1.00 = 2.87

Conversion (%) of 2-(4-methoxybenzylidene)malononitrile = (1/2.87) \* 100 = 35%.



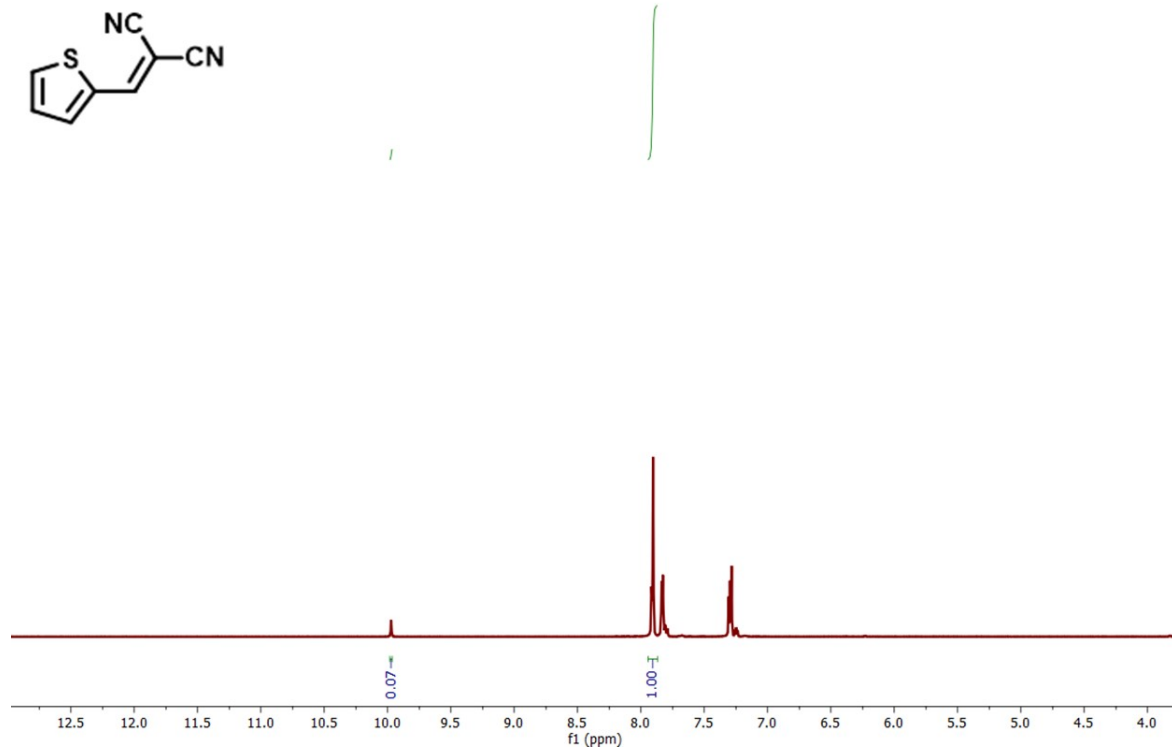

**Fig. S27** <sup>1</sup>H NMR spectrum of 2-(thiophen-2-ylmethylene)malononitrile in CDCl<sub>3</sub>.

**Calculation of the conversion (%) in the Knoevenagel condensation reaction of thiophene-2-carboxaldehyde with malononitrile catalyzed by 2a (Table 4, entry 6)**

Total amount of compounds at the end: Unreacted thiophene-2-carboxaldehyde (9.9 ppm) + 2-(thiophen-2-ylmethylene)malononitrile (7.8 ppm) = 0.07 + 1.00 = 1.07

Conversion (%) of 2-(thiophen-2-ylmethylene)malononitrile = (1/1.07) \* 100 = 93%.

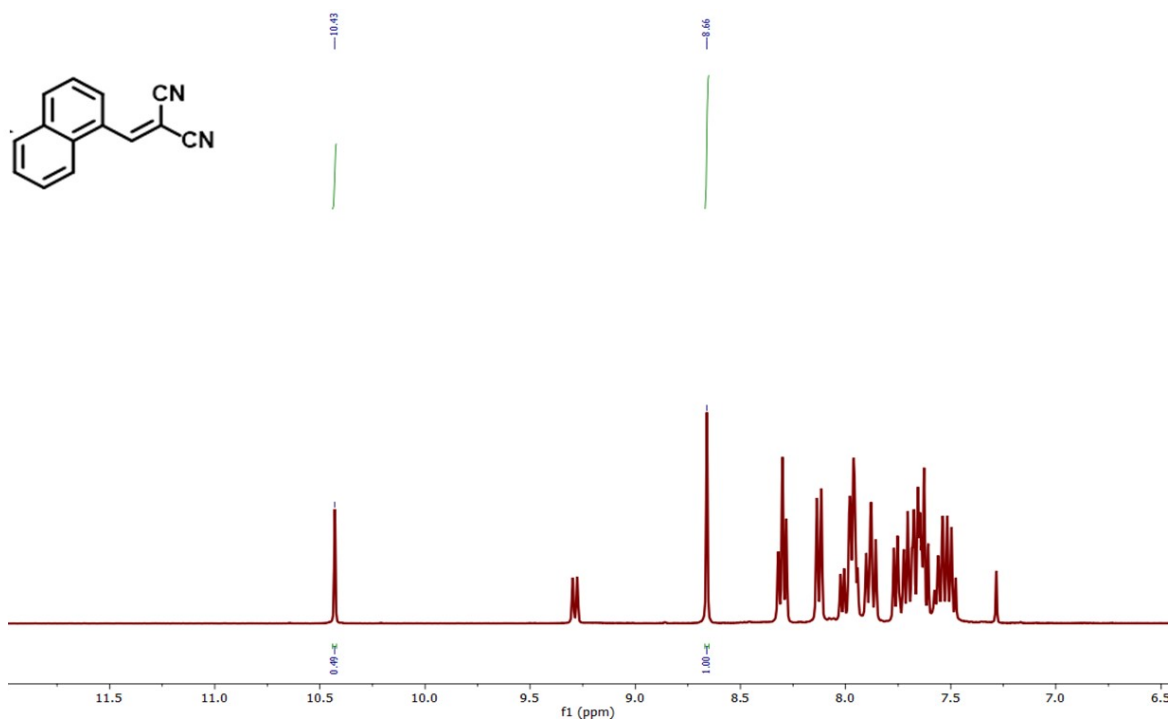

**Fig. S28** <sup>1</sup>H NMR spectrum of 2-(naphthalen-1-ylmethylene)malononitrile in CDCl<sub>3</sub>.

**Calculation of the conversion (%) in the Knoevenagel condensation reaction of naphthalene-2-carboxaldehyde with malononitrile catalyzed by 2a (Table 4, entry 7)**

Total amount of compounds at the end: Unreacted naphthaldehyde (10.43 ppm) + 2-(naphthalen-1-ylmethylene)malononitrile (8.66 ppm) = 0.49 + 1.00 = 1.49

Conversion (%) of 2-(naphthalen-1-ylmethylene)malononitrile =  $(1/1.49) * 100 = 67\%$ .

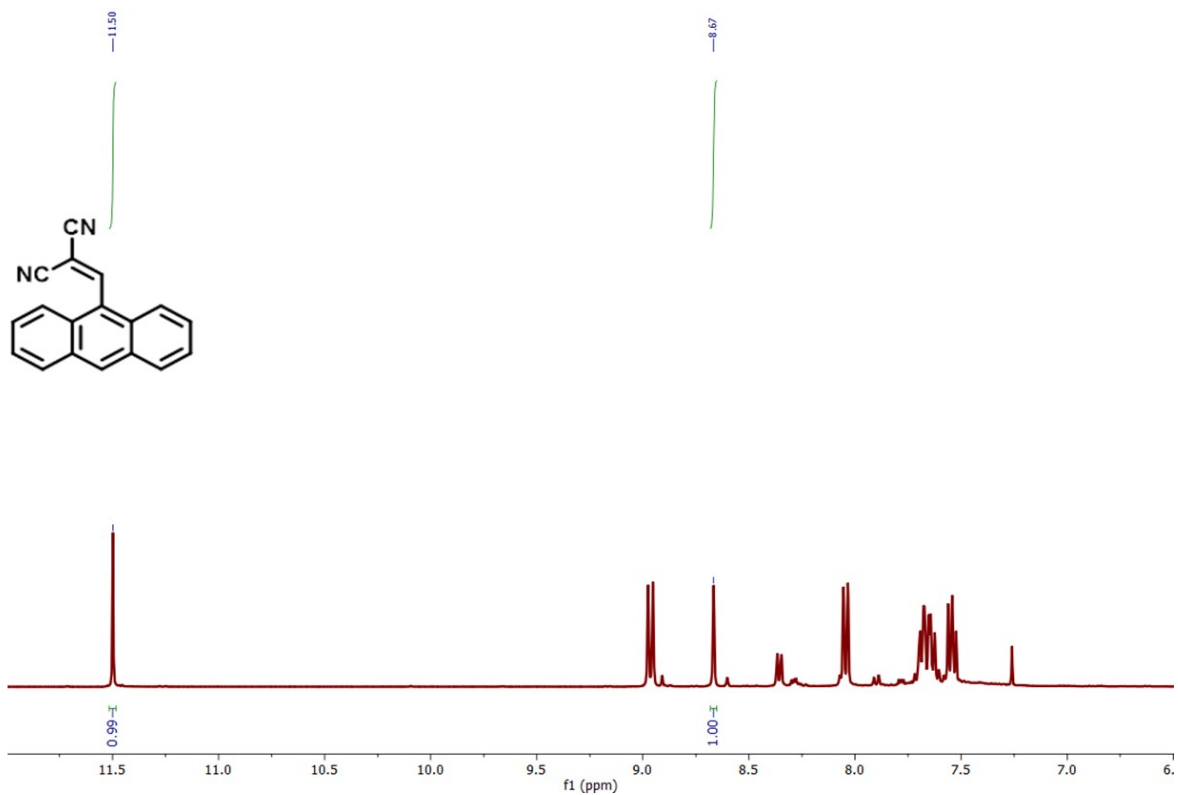

**Fig. S29** <sup>1</sup>H NMR spectrum of 2-(anthracen-9-ylmethylene)malononitrile in CDCl<sub>3</sub>.

**Calculation of the conversion (%) in the Knoevenagel condensation reaction of 9-anthracene-carboxaldehyde with malononitrile catalyzed by 2a (Table 4, entry 8)**

Total amount of compounds at the end: Unreacted naphthaldehyde (11.50 ppm) + 2-(anthracen-9-ylmethylene)malononitrile (8.67 ppm) = 0.99 + 1.00 = 1.99

Conversion (%) of 2-(anthracen-9-ylmethylene)malononitrile = (1/1.99) \* 100 = 50%.

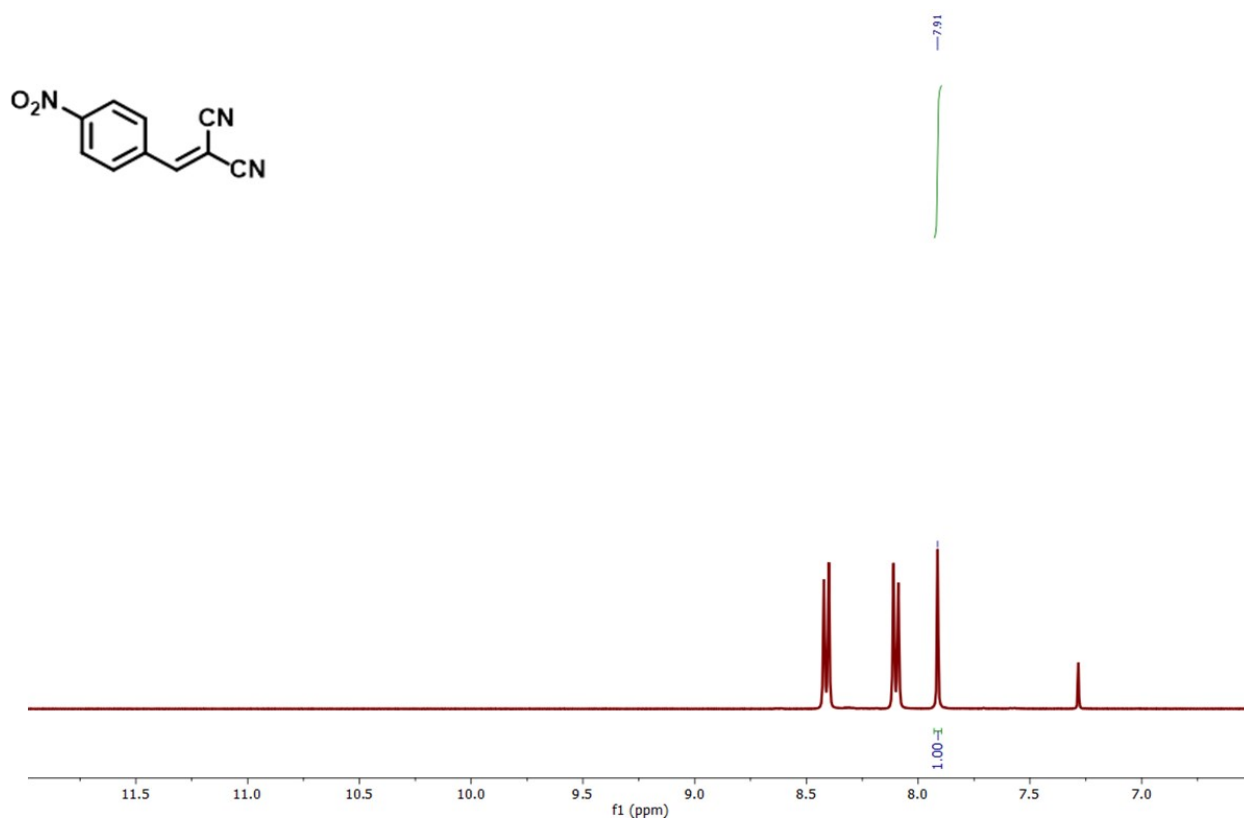

**Fig. S30** <sup>1</sup>H NMR spectrum of 2-(4-nitrobenzylidene)malononitrile in CDCl<sub>3</sub>.

**Calculation of the conversion (%) in the Knoevenagel condensation reaction of 4-nitrobenzaldehyde with malononitrile catalyzed by 4a** (Table 4, entry 1)

Total amount of compounds at the end: Unreacted 4-nitrobenzaldehyde (10.01 ppm) + 2-(4-nitrobenzylidene)malononitrile (7.91 ppm) = 0 + 1.00 = 1

Conversion (%) of 2-(4-nitrobenzylidene)malononitrile = (1/1) \* 100 = 100%.

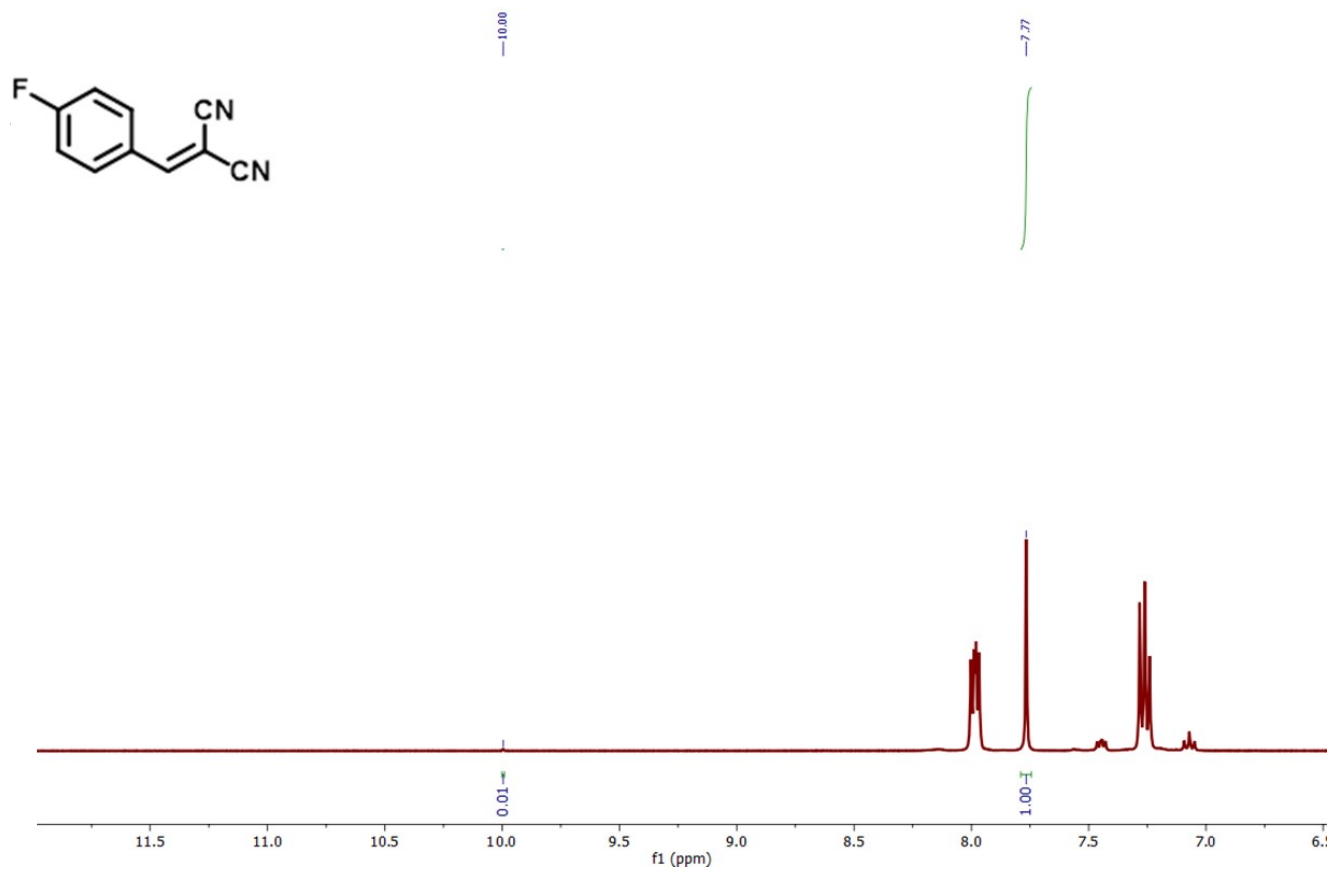

**Fig. S31** <sup>1</sup>H NMR spectrum of 2-(4-fluorobenzylidene)malononitrile in CDCl<sub>3</sub>.

**Calculation of the conversion (%) in the Knoevenagel condensation reaction of 4-fluorobenzaldehyde with malononitrile catalyzed by 4a** (Table 4, entry 2)

Total amount of compounds at the end: Unreacted 4-fluorobenzaldehyde (10 ppm) + 2-(4-fluorobenzylidene)malononitrile (7.77 ppm) = 0.01 + 1.00 = 1.01

Conversion (%) of 2-(4-fluorobenzylidene)malononitrile =  $(1/1.01) * 100 = 99\%$ .

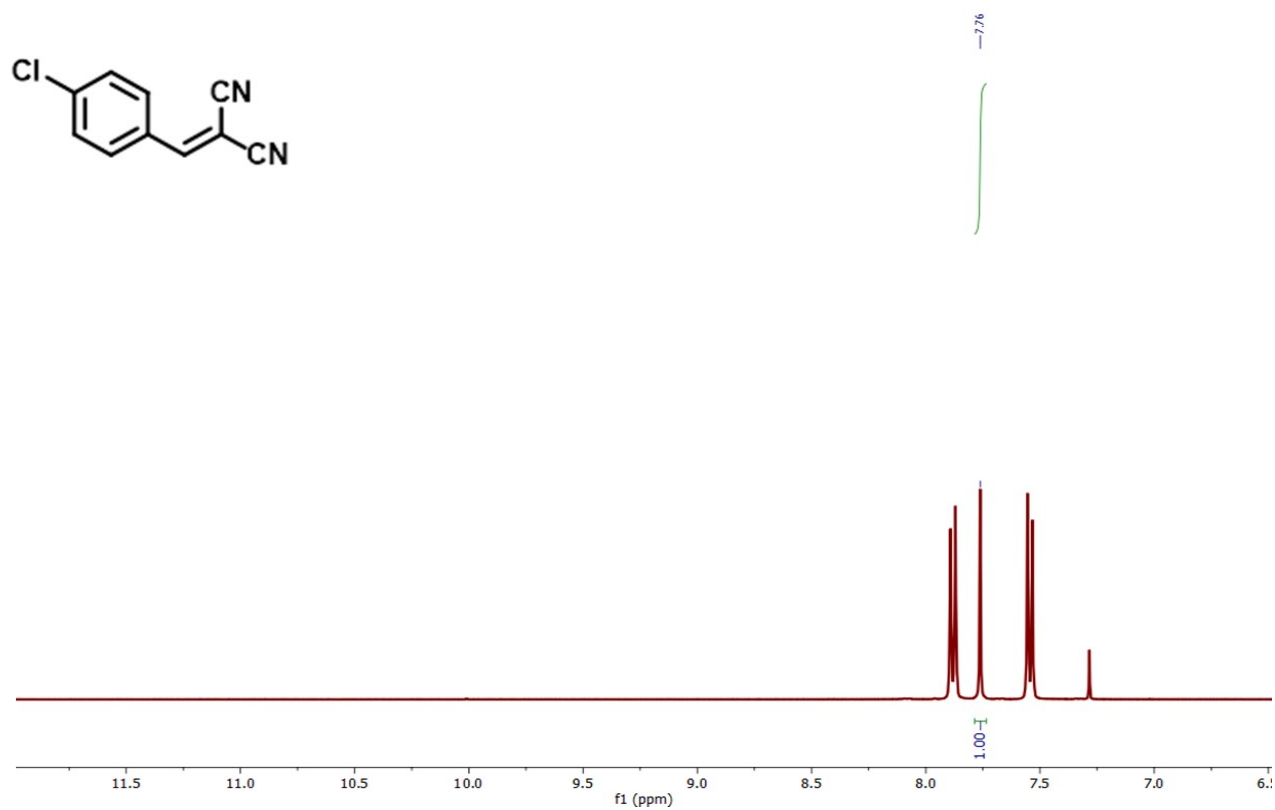

**Fig. S32**  $^1\text{H}$  NMR spectrum of 2-(4-chlorobenzylidene)malononitrile in  $\text{CDCl}_3$ .

**Calculation of the conversion (%) in the Knoevenagel condensation reaction of 4-chlorobenzaldehyde with malononitrile catalyzed by 4a (Table 4, entry 3)**

Total amount of compounds at the end: Unreacted 4-chlorobenzaldehyde (10.01 ppm) + 2-(4-chlorobenzylidene)malononitrile (7.76 ppm) = 0 + 1.00 = 1

Conversion (%) of 2-(4-chlorobenzylidene)malononitrile =  $(1/1) * 100 = 100\%$ .

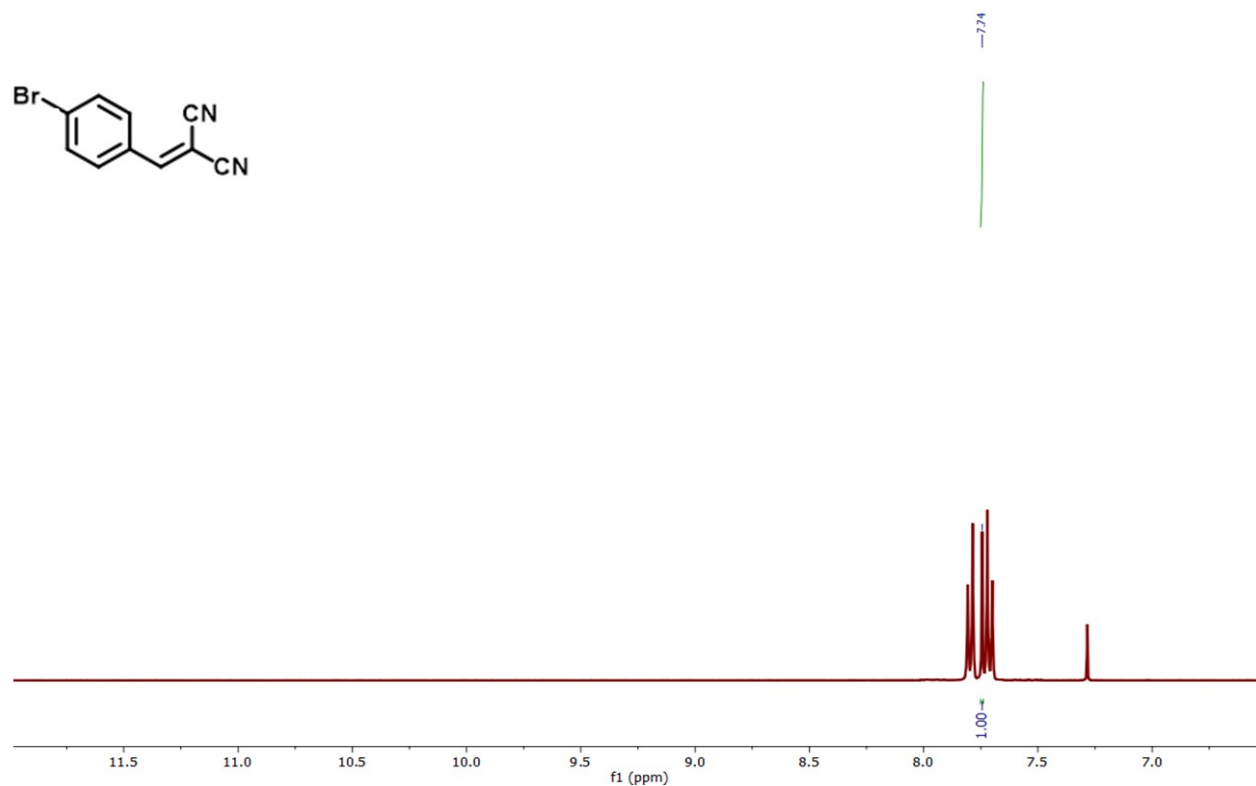

**Fig. S33** <sup>1</sup>H NMR spectrum of 2-(4-bromobenzylidene)malononitrile in CDCl<sub>3</sub>.

**Calculation of the conversion (%) in the Knoevenagel condensation reaction of 4-bromobenzaldehyde with malononitrile catalyzed by 4a (Table 4, entry 4)**

Total amount of compounds at the end: Unreacted 4-bromobenzaldehyde (10.01 ppm) + 2-(4-bromobenzylidene)malononitrile (7.74 ppm) = 0 + 1.00 = 1

Conversion (%) of 2-(4-bromobenzylidene)malononitrile = (1/1) \* 100 = 100%.

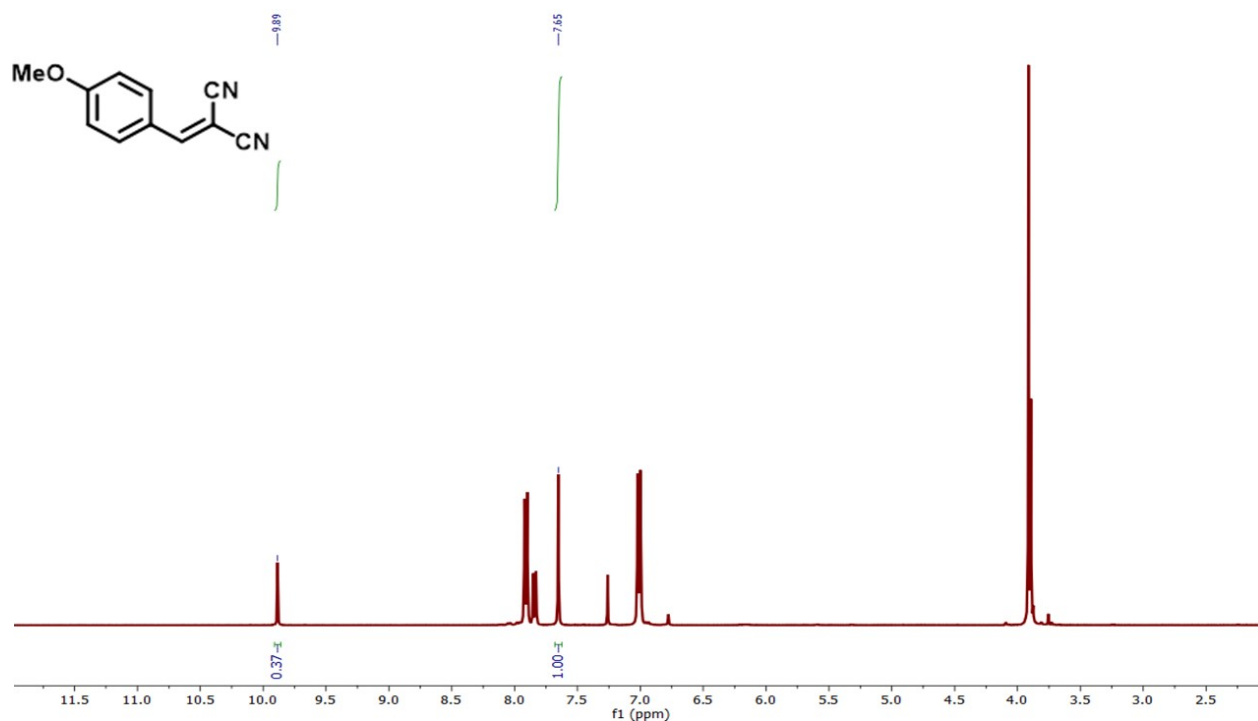

**Fig. S34** <sup>1</sup>H NMR spectrum of 2-(4-methoxybenzylidene)malononitrile in CDCl<sub>3</sub>.

**Calculation of the conversion (%) in the Knoevenagel condensation reaction of 4-methoxybenzaldehyde with malononitrile catalyzed by 4a (Table 4, entry 5)**

Total amount of compounds at the end: Unreacted 4-methoxybenzaldehyde (9.89 ppm) + 2-(4-methoxybenzylidene)malononitrile (7.65 ppm) = 0.37 + 1.00 = 1.37

Conversion (%) of 2-(4-methoxybenzylidene)malononitrile =  $(1/1.37) * 100 = 73\%$ .



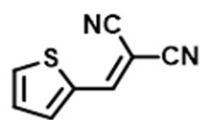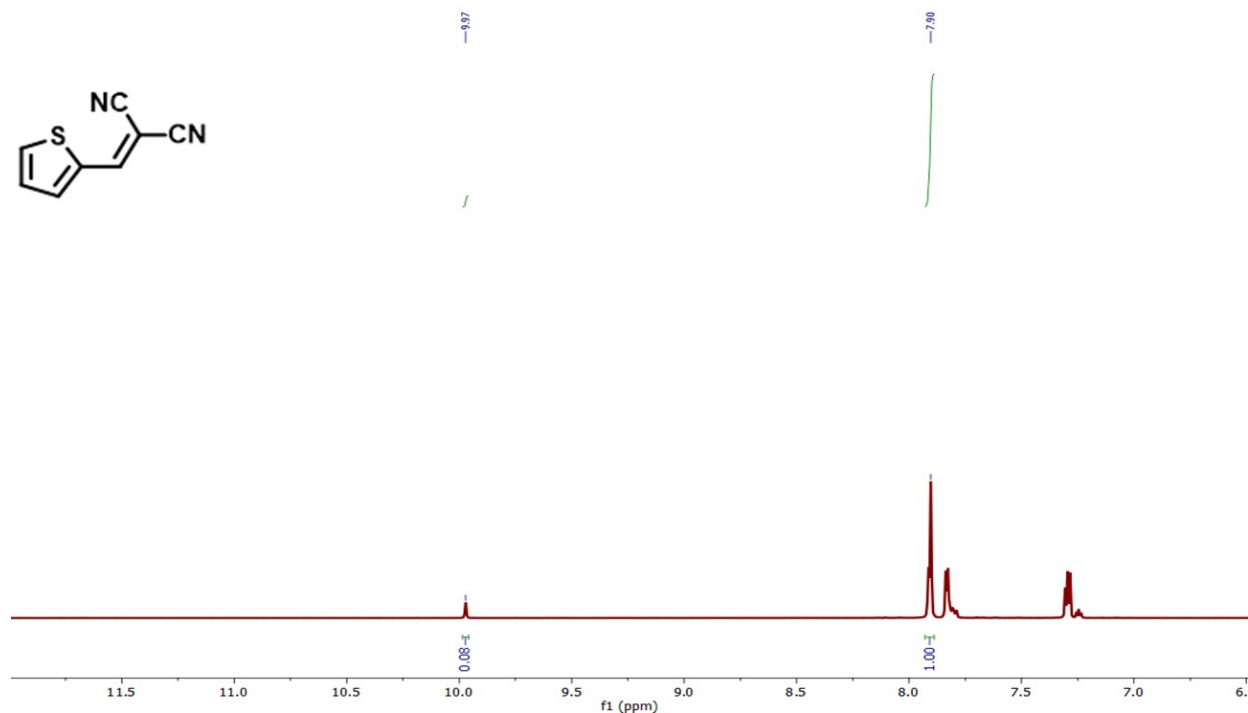

**Fig. S35**  $^1\text{H}$  NMR spectrum of 2-(thiophen-2-ylmethylene)malononitrile in  $\text{CDCl}_3$ .

**Calculation of the conversion (%) in the Knoevenagel condensation reaction of thiophene-2-carboxaldehyde with malononitrile catalyzed by 4a (Table 4, entry 6)**

Total amount of compounds at the end: Unreacted thiophene-2-carboxaldehyde (9.97 ppm) + 2-(thiophen-2-ylmethylene)malononitrile (7.9 ppm) = 0.08 + 1.00 = 1.08

Conversion (%) of 2-(thiophen-2-ylmethylene)malononitrile =  $(1/1.08) * 100 = 92\%$ .

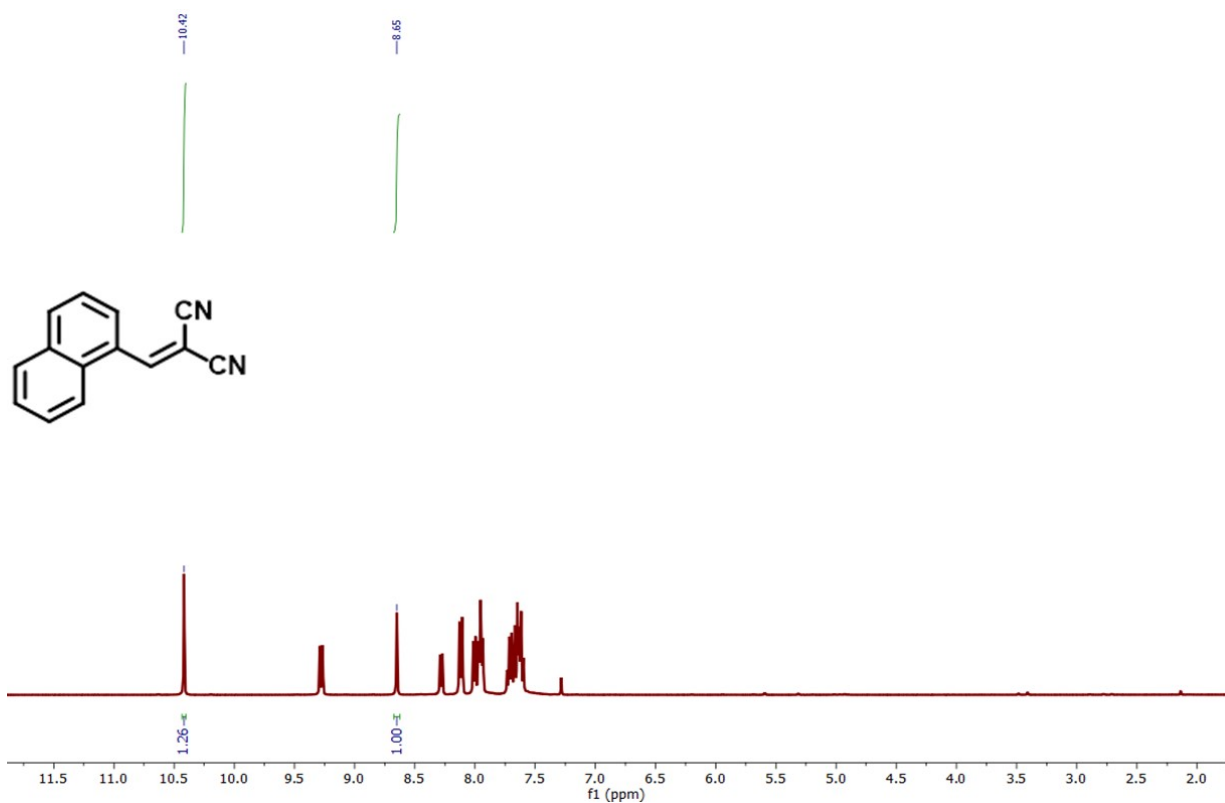

**Fig. S36**  $^1\text{H}$  NMR spectrum of 2-(naphthalen-1-ylmethylene)malononitrile in  $\text{CDCl}_3$ .

**Calculation of the conversion (%) in the Knoevenagel condensation reaction of naphthalene-2-carboxaldehyde with malononitrile catalyzed by 4a** (Table 4, entry 7)

Total amount of compounds at the end: Unreacted naphthaldehyde (10.42 ppm) + 2-(naphthalen-1-ylmethylene)malononitrile (8.65 ppm) = 1.26 + 1.00 = 2.26

Conversion (%) of 2-(naphthalen-1-ylmethylene)malononitrile =  $(1/2.26) * 100 = 44\%$ .

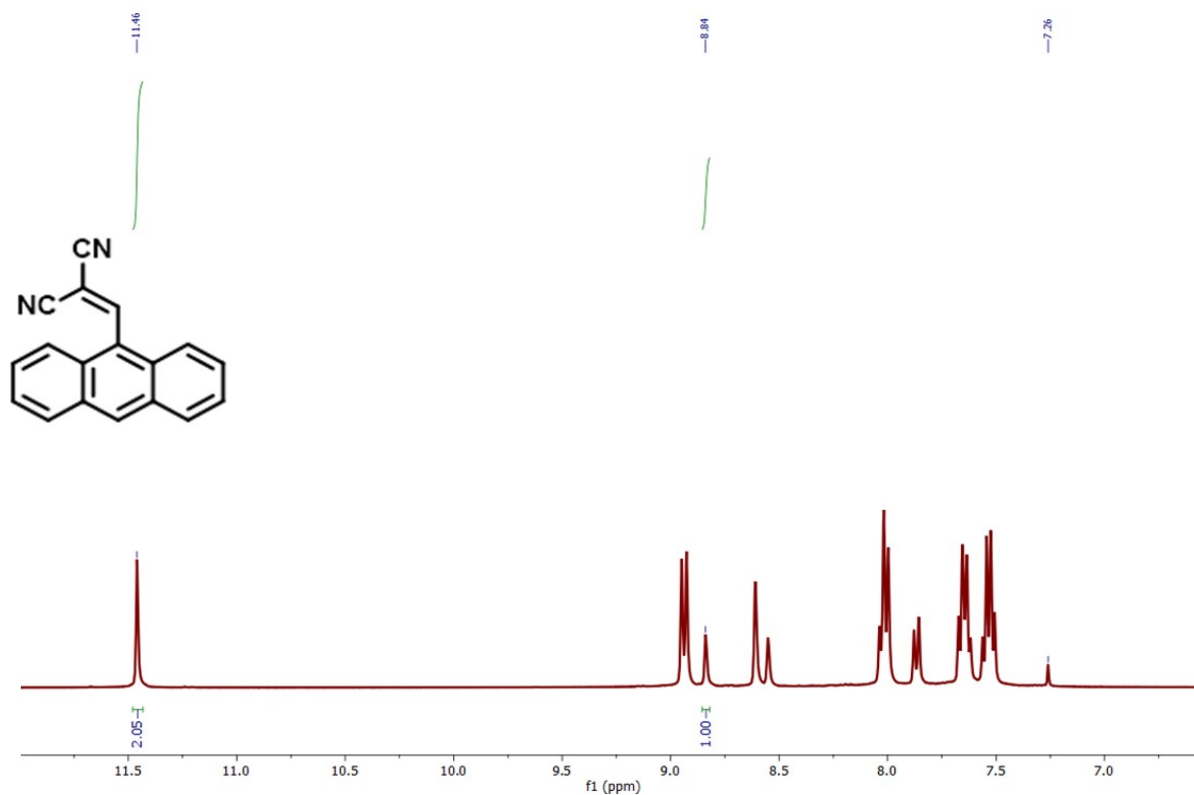

**Fig. S37**  $^1\text{H}$  NMR spectrum of 2-(anthracen-9-ylmethylene)malononitrile in  $\text{CDCl}_3$ .

**Calculation of the conversion (%) in the Knoevenagel condensation reaction of 9-anthracene-carboxaldehyde with malononitrile catalyzed by 4a (Table 4, entry 8)**

Total amount of compounds at the end: Unreacted naphthaldehyde (11.46 ppm) + 2-(anthracen-9-ylmethylene)malononitrile (8.84 ppm) = 2.05 + 1.00 = 3.05

Conversion (%) of 2-(anthracen-9-ylmethylene)malononitrile =  $(1/3.05) * 100 = 33\%$ .

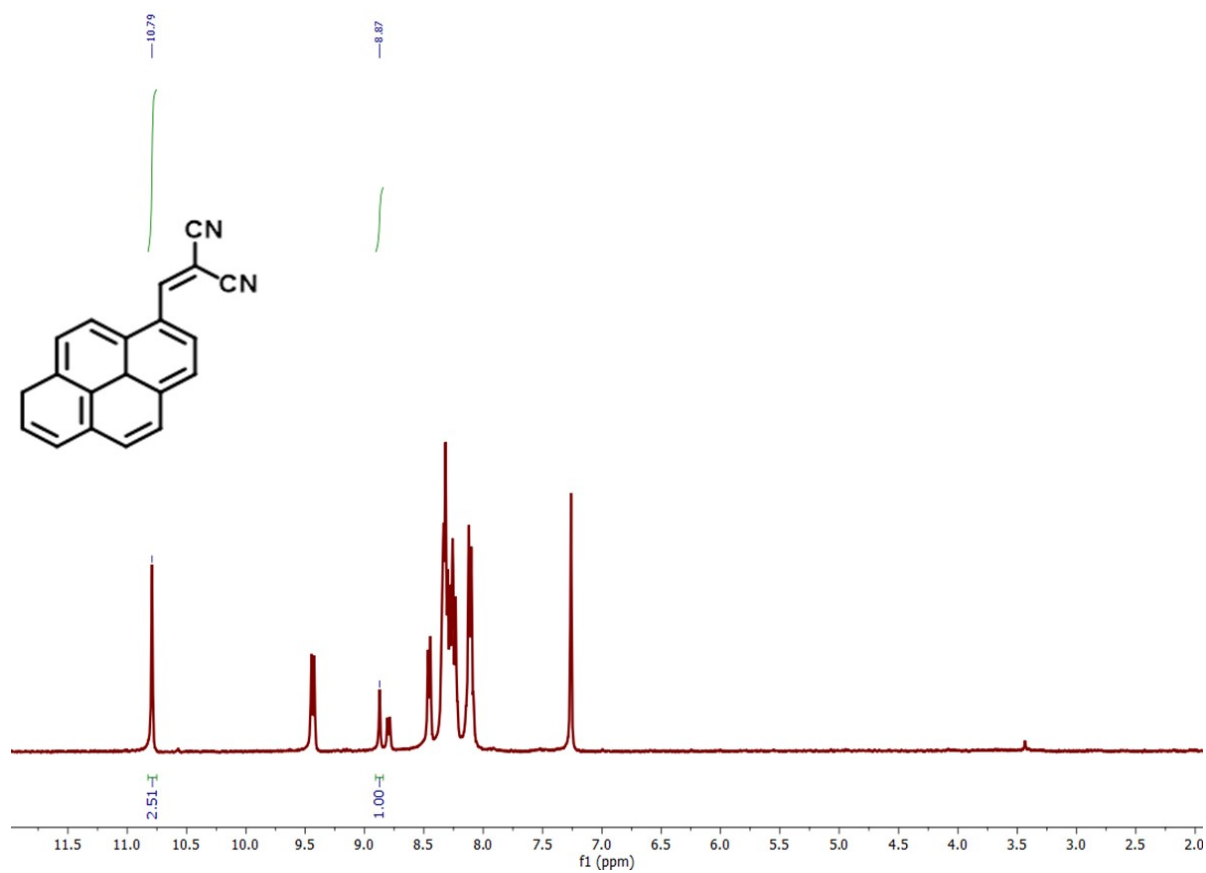

**Fig. S38** <sup>1</sup>H NMR spectrum of 2-(pyren-1-ylmethylene)malononitrile in CDCl<sub>3</sub>.

**Calculation of the conversion (%) in the Knoevenagel condensation reaction of 1-pyrene-carboxaldehyde with malononitrile catalyzed by 4a (Table 4, entry 9)**

Total amount of compounds at the end: Unreacted naphthaldehyde (10.79 ppm) + 2-(pyren-1-ylmethylene)malononitrile (8.87 ppm) = 2.51 + 1.00 = 3.51

Conversion (%) of 2-(pyren-1-ylmethylene)malononitrile = (1/3.51) \* 100 = 28%.

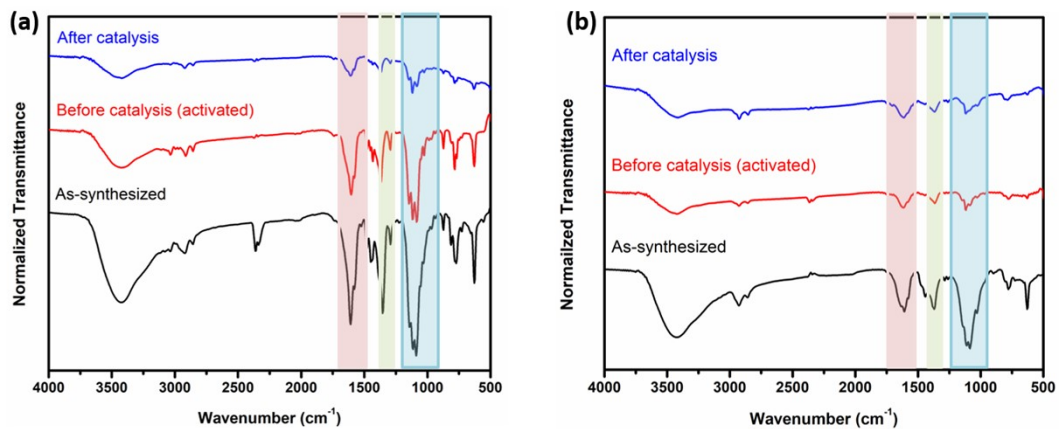

**Fig. S39** Comparison of FTIR spectra of (a) **2** and (b) **4** [as-synthesized, before and after catalysis].

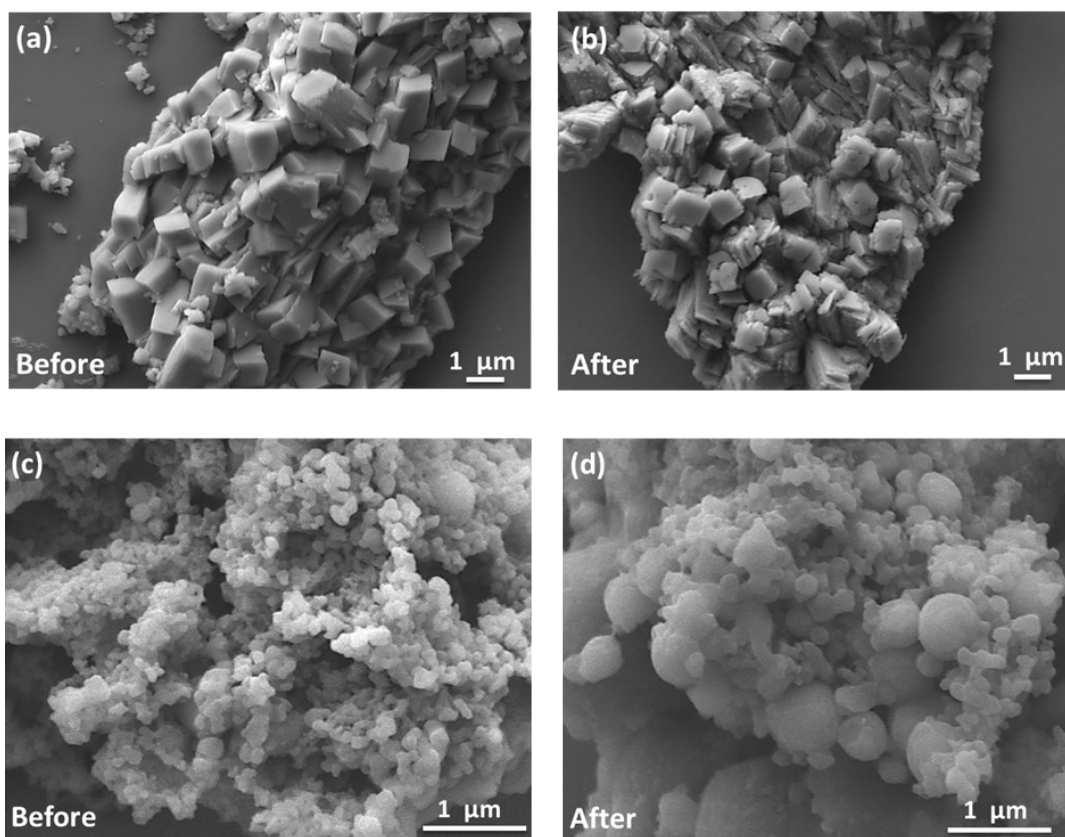

**Fig. S40** FESEM images of **2** and **4** before (a,c) and after (b,d) catalysis, respectively.

**Table S1** Selected bond lengths (Å) and angles (°) for **1**.

## Bond distances (Å)

|        |           |        |           |
|--------|-----------|--------|-----------|
| Cu1-N1 | 1.964(10) | Cu1-N3 | 1.991(10) |
| Cu1-O2 | 1.995(8)  | Cu1-N2 | 2.045(10) |
| Cu1-O1 | 2.313(8)  | Cu2-O5 | 1.949(8)  |
| Cu2-N6 | 1.994(11) | Cu2-N4 | 1.999(11) |
| Cu2-N5 | 2.045(9)  | Cu2-O7 | 2.244(8)  |

## Bond angles (°)

|           |          |           |          |
|-----------|----------|-----------|----------|
| N1-Cu1-N3 | 165.2(4) | N1-Cu1-O2 | 97.6(3)  |
| N3-Cu1-O2 | 97.0(4)  | N1-Cu1-N2 | 83.5(4)  |
| N3-Cu1-N2 | 81.9(4)  | O2-Cu1-N2 | 159.9(3) |
| N1-Cu1-O1 | 89.2(3)  | N3-Cu1-O1 | 93.1(4)  |
| O2-Cu1-O1 | 90.9(3)  | N2-Cu1-O1 | 109.2(3) |
| O5-Cu2-N6 | 98.3(4)  | O5-Cu2-N4 | 97.7(4)  |
| N6-Cu2-N4 | 161.6(4) | O5-Cu2-N5 | 172.7(3) |
| N6-Cu2-N5 | 80.1(5)  | N4-Cu2-N5 | 83.0(5)  |
| O5-Cu2-O7 | 88.8(3)  | N6-Cu2-O7 | 93.9(3)  |
| N4-Cu2-O7 | 95.6(3)  | N5-Cu2-O7 | 98.5(4)  |

**Table S2** Hydrogen Bonding Parameters for **1**.

| D <sup>⋯</sup> H <sup>⋯</sup> A      | r(D <sup>⋯</sup> H) (Å) | r(H <sup>⋯</sup> A) (Å) | r(D <sup>⋯</sup> A) (Å) | ∠D <sup>⋯</sup> H <sup>⋯</sup> A (deg) |
|--------------------------------------|-------------------------|-------------------------|-------------------------|----------------------------------------|
| O1 <sup>⋯</sup> H1A <sup>⋯</sup> O12 | 0.86                    | 2.28                    | 3.0781(13)              | 154.00                                 |
| C6 <sup>⋯</sup> H6B <sup>⋯</sup> O15 | 0.99                    | 2.39                    | 3.3471(14)              | 162.00                                 |
| C7 <sup>⋯</sup> H7C <sup>⋯</sup> O15 | 0.99                    | 2.49                    | 3.4661(15)              | 171.00                                 |
| C10 <sup>⋯</sup> H10 <sup>⋯</sup> O8 | 0.95                    | 2.40                    | 3.2827(14)              | 155.00                                 |
| C16 <sup>⋯</sup> H16 <sup>⋯</sup> O3 | 0.95                    | 2.36                    | 3.1915(14)              | 145.00                                 |

**Calculation for Determining the Number of Solvent Molecules Squeezed Out for the Refinement of SCXRD Structure of 1:**

A solvent mask was calculated and 376 electrons were found in a volume of 1016 Å<sup>3</sup> in **1** voids per unit cell. This is consistent with the presence of 1[CH<sub>3</sub>OH], 1[8H<sub>2</sub>O] per Asymmetric Unit, which account for 392 electrons per unit cell.

**Table S3** Selected bond lengths (Å) and angles (°) for **2**.

## Bond distances (Å)

|        |          |         |          |
|--------|----------|---------|----------|
| Cu1-N3 | 1.965(3) | Cu1-N8  | 1.972(3) |
| Cu1-O5 | 1.985(3) | Cu1-N2  | 2.031(3) |
| Cu1-O1 | 2.487(3) | Cu2-N6  | 1.971(3) |
| Cu2-O8 | 1.976(3) | Cu2-N4  | 1.989(3) |
| Cu2-N5 | 2.035(3) | Cu2-O10 | 2.353(3) |

## Bond angles (°)

|            |            |            |            |
|------------|------------|------------|------------|
| N3-Cu1-N8  | 165.81(14) | N3-Cu1-O5  | 97.10(13)  |
| N8-Cu1-O5  | 96.74(12)  | N3-Cu1-N2  | 83.47(13)  |
| N8-Cu1-N2  | 83.79(13)  | O5-Cu1-N2  | 166.74(12) |
| N3-Cu1-O1  | 85.99(12)  | N8-Cu1-O1  | 86.73(12)  |
| O5-Cu1-O1  | 108.17(10) | N2-Cu1-O1  | 85.08(11)  |
| N6-Cu2-O8  | 100.83(13) | N6-Cu2-N4  | 165.18(14) |
| O8-Cu2-N4  | 93.96(13)  | N6-Cu2-N5  | 83.18(13)  |
| O8-Cu2-N5  | 160.46(12) | N4-Cu2-N5  | 83.13(13)  |
| N6-Cu2-O10 | 91.73(12)  | O8-Cu2-O10 | 109.50(11) |
| N4-Cu2-O10 | 82.47(12)  | N5-Cu2-O10 | 89.34(12)  |

**Table S4** Hydrogen Bonding Parameters for **2**.

| <b>D···H···A</b> | <b>r(D···H) (Å)</b> | <b>r(H···A) (Å)</b> | <b>r(D···A) (Å)</b> | <b>∠D···H···A (deg)</b> |
|------------------|---------------------|---------------------|---------------------|-------------------------|
| O14···H14C···O5  | 0.85                | 2.18                | 3.018 (4)           | 170.00                  |
| O14···H14D···O9  | 0.85                | 2.13                | 2.964 (4)           | 169.00                  |
| C2···H2···O5     | 0.95                | 2.57                | 3.486 (6)           | 162.00                  |
| C6···H6A···O11   | 0.99                | 2.51                | 3.335 (6)           | 140.00                  |
| C7···H7A···O2    | 0.99                | 2.51                | 3.412(5)            | 151.00                  |
| C7···H7B···O12   | 0.99                | 2.54                | 3.453(5)            | 153.00                  |
| C10···H10···O6   | 0.95                | 2.48                | 3.208 (5)           | 133.00                  |
| C13···H13B···O13 | 0.99                | 2.41                | 3.194 (5)           | 136.00                  |
| C18···H18···O15  | 0.95                | 2.53                | 3.332(7)            | 142.00                  |
| C21···H21B···O9  | 0.99                | 2.42                | 3.220 (5)           | 137.00                  |
| C23···H23A···O14 | 0.99                | 2.37                | 3.345 (5)           | 170.00                  |
| C23···H23B···O3  | 0.99                | 2.55                | 3.207 (5)           | 123.00                  |
| C26···H26···O9   | 0.95                | 2.58                | 3.175 (5)           | 121.00                  |
| C29···H29A···O11 | 0.99                | 2.55                | 3.327 (5)           | 136.00                  |
| C29···H29A···O3  | 0.99                | 2.58                | 3.197 (5)           | 121.00                  |
| C31···H31···O2   | 0.95                | 2.59                | 3.322(5)            | 135.00                  |
| C34···H34···O6   | 0.95                | 2.40                | 3.182 (5)           | 139.00                  |
| C34···H35A···O14 | 0.98                | 2.26                | 3.032 (14)          | 135.00                  |
| C35···H35C···O4  | 0.98                | 2.23                | 3.100 (15)          | 148.00                  |



**Table S5** Selected bond lengths (Å) and angles (°) for **3**.

Bond distances (Å)

|         |           |         |           |
|---------|-----------|---------|-----------|
| Cu01-N1 | 1.952(10) | Cu01-O4 | 1.984(9)  |
| Cu01-N3 | 1.985(10) | Cu01-N2 | 2.048(10) |
| Cu01-O6 | 2.251(9)  | Cu02-N6 | 1.953(10) |
| Cu02-O2 | 1.968(8)  | Cu02-N4 | 1.968(10) |
| Cu02-N5 | 2.025(9)  | Cu02-O7 | 2.502(10) |

Bond angles (°)

|            |          |            |          |
|------------|----------|------------|----------|
| N1-Cu01-O4 | 94.7(4)  | N1-Cu01-N3 | 165.9(4) |
| O4-Cu01-N3 | 96.6(4)  | N1-Cu01-N2 | 83.9(4)  |
| O4-Cu01-N2 | 159.9(4) | N3-Cu01-N2 | 82.6(4)  |
| N1-Cu01-O6 | 96.7(4)  | O4-Cu01-O6 | 94.6(3)  |
| N3-Cu01-O6 | 90.8(4)  | N2-Cu01-O6 | 105.4(4) |
| N6-Cu02-O2 | 96.2(4)  | N6-Cu02-N4 | 166.6(4) |
| O2-Cu02-N4 | 97.2(4)  | N6-Cu02-N5 | 83.3(4)  |
| O2-Cu02-N5 | 176.8(4) | N4-Cu02-N5 | 83.4(4)  |
| N6-Cu02-O7 | 90.7(4)  | O2-Cu02-O7 | 95.1(3)  |
| N4-Cu02-O7 | 86.5(4)  | N5-Cu02-O7 | 88.1(3)  |

**Table S6** Selected bond lengths (Å) and angles (°) for **4**.

Bond distances (Å)

|        |           |        |           |
|--------|-----------|--------|-----------|
| Cu1-N3 | 1.959(16) | Cu1-N2 | 1.975(16) |
| Cu1-O1 | 1.978(14) | Cu1-N1 | 1.987(13) |
| Cu1-O4 | 2.358(14) | Cl1-O6 | 1.25(2)   |

Bond angles (°)

|           |          |           |          |
|-----------|----------|-----------|----------|
| N3-Cu1-N2 | 166.6(7) | N3-Cu1-O1 | 95.1(6)  |
| N2-Cu1-O1 | 97.2(6)  | N3-Cu1-N1 | 84.4(6)  |
| N2-Cu1-N1 | 84.7(6)  | O1-Cu1-N1 | 167.2(6) |
| N3-Cu1-O4 | 82.0(6)  | N2-Cu1-O4 | 90.8(6)  |
| O1-Cu1-O4 | 99.1(7)  | N1-Cu1-O4 | 93.5(7)  |

**Table S7** Comparison of the catalytic activity of various MOCNs in the Knoevenagel condensation reaction of an aldehyde and malononitrile

| Catalyst                                                                                                                                                                      | Cat. amount | Time (h) | Solvent                          | Temp (°C) | Yield (%) | Ref. <sup>a</sup> |
|-------------------------------------------------------------------------------------------------------------------------------------------------------------------------------|-------------|----------|----------------------------------|-----------|-----------|-------------------|
| {[Cu <sub>2</sub> (tpbn) <sub>2</sub> (fdc)(ClO <sub>4</sub> ) <sub>2</sub> ]·H <sub>2</sub> O·2CH <sub>3</sub> CH <sub>2</sub> OH} <sub>n</sub> ( <b>2</b> )                 | 3 mol%      | 2        | CH <sub>3</sub> OH               | r.t.      | 100       | This work         |
| [Cu <sub>4</sub> (tphpn) <sub>2</sub> (fdc) <sub>2</sub> (ClO <sub>4</sub> ) <sub>4</sub> ]·4H <sub>2</sub> O·NaClO <sub>4</sub> ( <b>4</b> )                                 | 2 mol%      | 2        | CH <sub>3</sub> OH               | r.t.      | 98        | This work         |
| Zn-CBS                                                                                                                                                                        | 5 mol%      | 3        | CH <sub>3</sub> OH               | r.t.      | 82        | 46                |
| ZIF-9                                                                                                                                                                         | 5 mol%      | 4        | Toluene                          | r.t.      | 99        | 48                |
| [Zn(Lz)(H <sub>2</sub> O) <sub>2</sub> ] <sub>n</sub> ·n(NMF)                                                                                                                 | 3 mol%      | 6        | THF                              | r.t.      | 97        | 49                |
| [Cd(4-btapa) <sub>2</sub> (NO <sub>3</sub> ) <sub>2</sub> ]·6H <sub>2</sub> O·2DMF                                                                                            | 5 mol%      | 12       | Benzene                          | r.t.      | 98        | 50                |
| {[Ni <sub>4</sub> (μ <sub>6</sub> -MTB) <sub>2</sub> (μ <sub>2</sub> -H <sub>2</sub> O) <sub>4</sub> (H <sub>2</sub> O) <sub>4</sub> ]·10DMF·11H <sub>2</sub> O} <sub>n</sub> | 3 mol%      | 6        | p-Xylene                         | r.t.      | 78        | 51                |
| [PbLx <sub>2</sub> ]·2DMF·6H <sub>2</sub> O                                                                                                                                   | 3 mol%      | 24       | CH <sub>3</sub> CN               | r.t.      | 78        | 52                |
| [Zn(κN-H <sub>3</sub> Ly)(H <sub>2</sub> O) <sub>3</sub> ]·3H <sub>2</sub> O                                                                                                  | 3 mol%      | 12       | THF                              | r.t.      | 89        | 53                |
| Tb.DCBA                                                                                                                                                                       | 10 (wt%)    | 6        | CH <sub>2</sub> Cl <sub>2</sub>  | r.t.      | >99       | 54                |
| NUC-27                                                                                                                                                                        | 0.03 mmol   | 1        | C <sub>2</sub> H <sub>5</sub> OH | 60        | 99        | 55                |
| [Zn(TIC4R)(HCOO)](HCOO)·0.5DMF·1.5H <sub>2</sub> O                                                                                                                            | 0.01 mmol   | 0.66     | -                                | 60        | >99       | 56                |
| {[Cd(bpp)(L)(H <sub>2</sub> O)]·DMF} <sub>n</sub>                                                                                                                             | 3 mol%      | 1        | CH <sub>3</sub> OH               | 30        | 80        | 57                |
| NUC-21                                                                                                                                                                        | 0.03 mmol   | 1        | -                                | 70        | 99        | 58                |
| {[Cd <sub>2</sub> (2-bpbg)(fum) <sub>2</sub> (H <sub>2</sub> O) <sub>2</sub> ]·8.5H <sub>2</sub> O} <sub>n</sub>                                                              | 2 mol%      | 1        | CH <sub>3</sub> OH               | 27        | 100       | 59                |
| V-Zn-MOF                                                                                                                                                                      | 1 mol%      | 1        | -                                | 60        | >99       | 60                |
| [Mn <sub>2</sub> (bpta) <sub>2</sub> (L1) <sub>2</sub> (H <sub>2</sub> O) <sub>2</sub> ]                                                                                      | 5 mol%      | 1.66     | Water                            | 30        | 98        | 61                |
| [Co <sub>2</sub> (tdc) <sub>2</sub> (tpxn)]·(H <sub>2</sub> O) <sub>6</sub> <sub>n</sub>                                                                                      | 2 mol%      | 1        | CH <sub>3</sub> OH               | 30        | 96        | 62                |
| SPUZ-1                                                                                                                                                                        | 1 mol%      | 0.5      | -                                | 60        | 99.9      | 63                |
| JNU-402-NH <sub>2</sub>                                                                                                                                                       | 0.06 mmol   | 1        | -                                | 80        | >99       | 64                |

<sup>a</sup>The reference numbers are as appeared in the paper
